# Supplementary material
Source: ML conference proceedings conference paper supplement (https://openreview.net/forum?id=2KjMQGOm4b)

## Unbiased

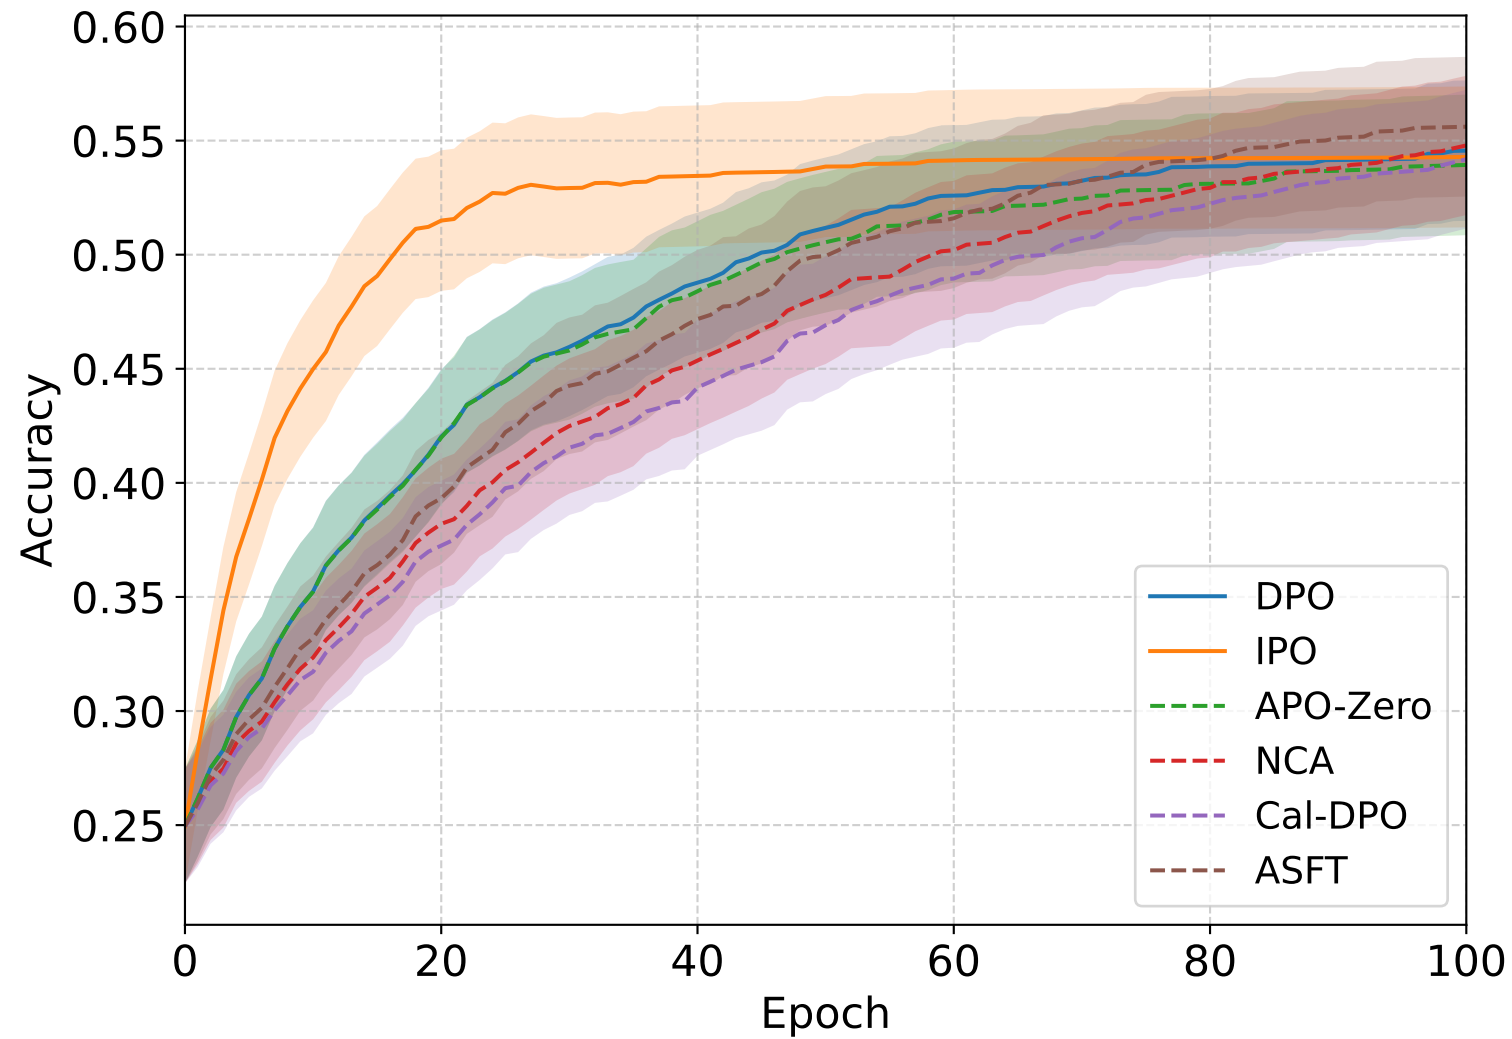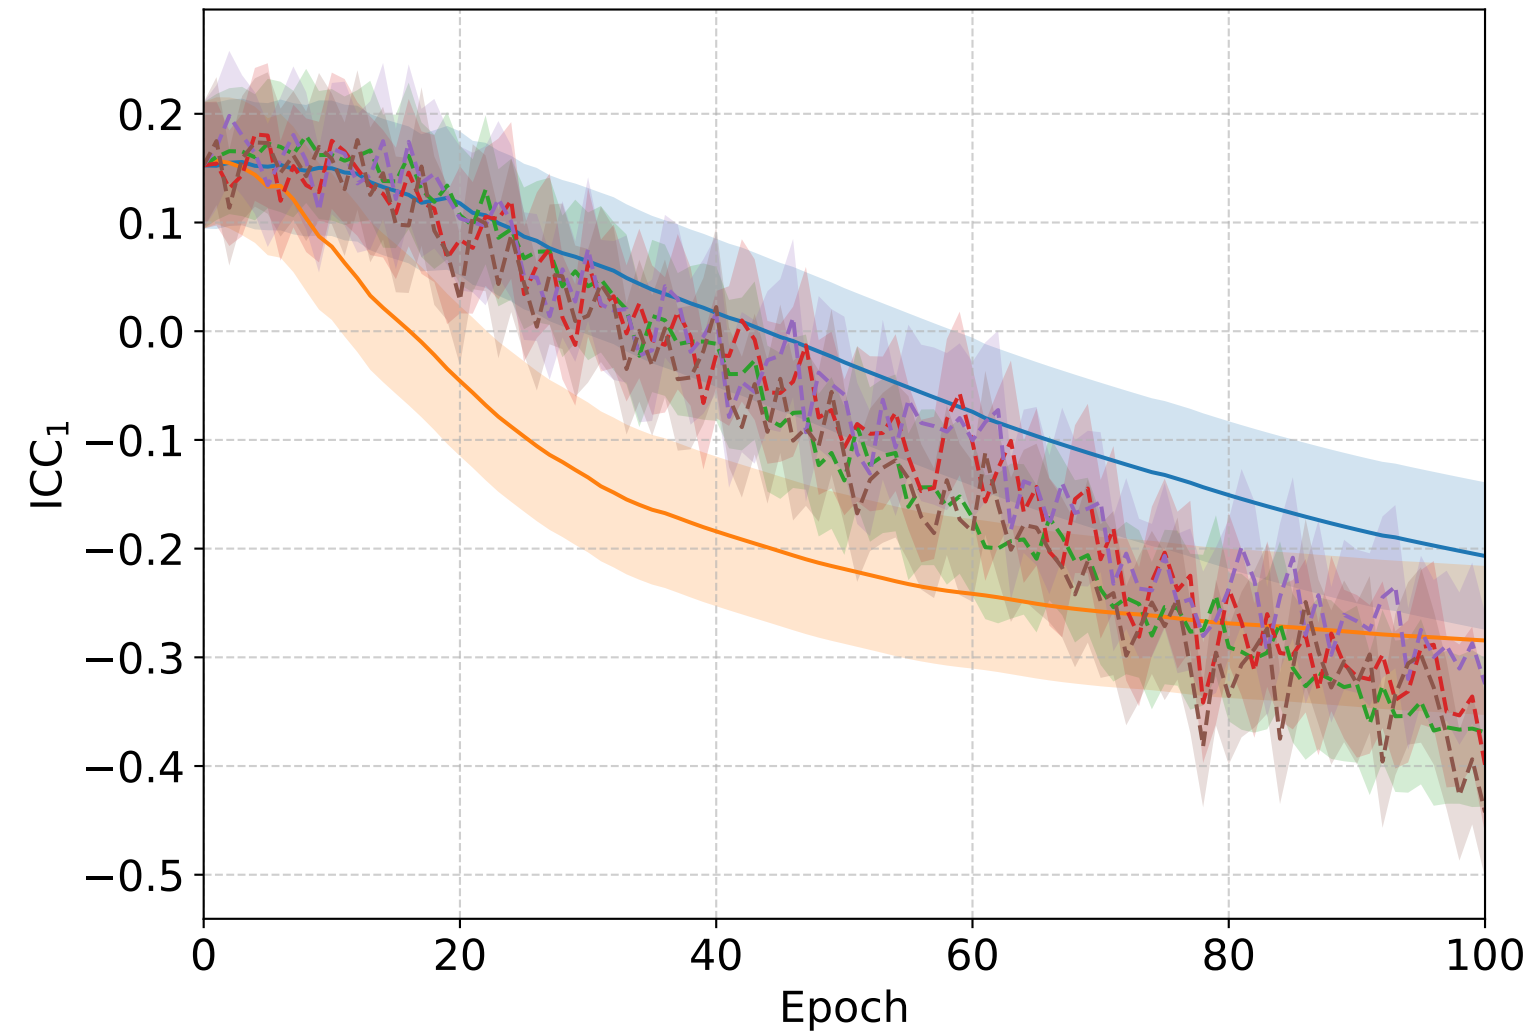

Supplement: supplementary_material [file losses_hid1_no_bias.pdf › blur_repo/toy_example/plots/losses_hid1_no_bias.pdf]

**Biased**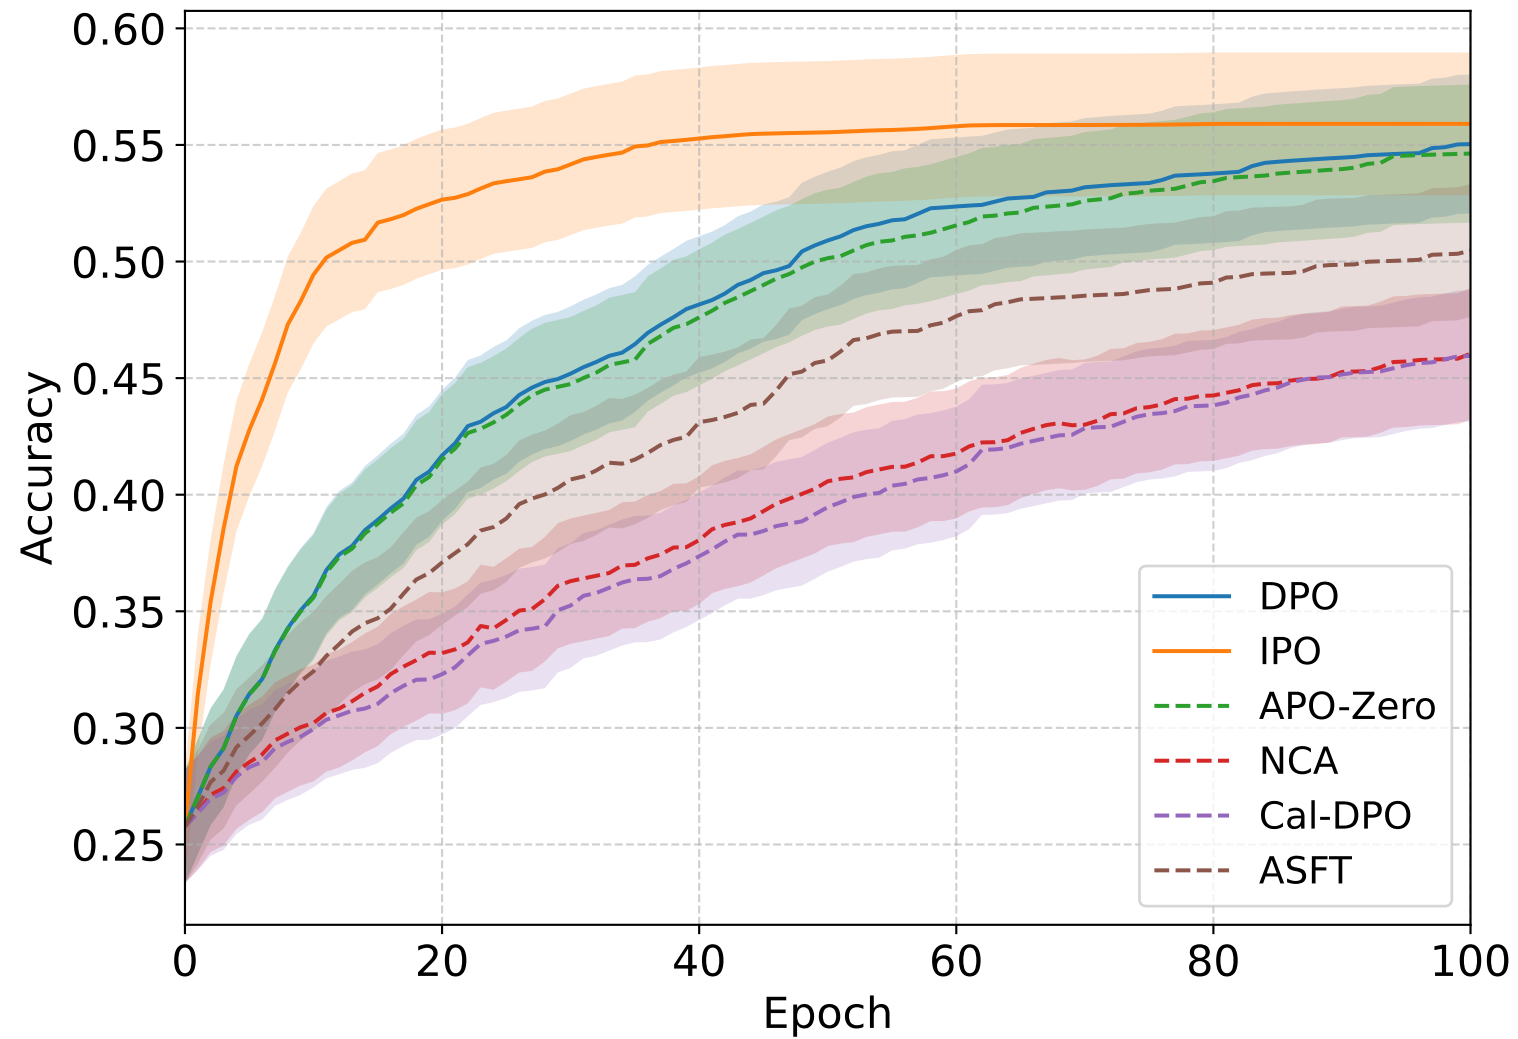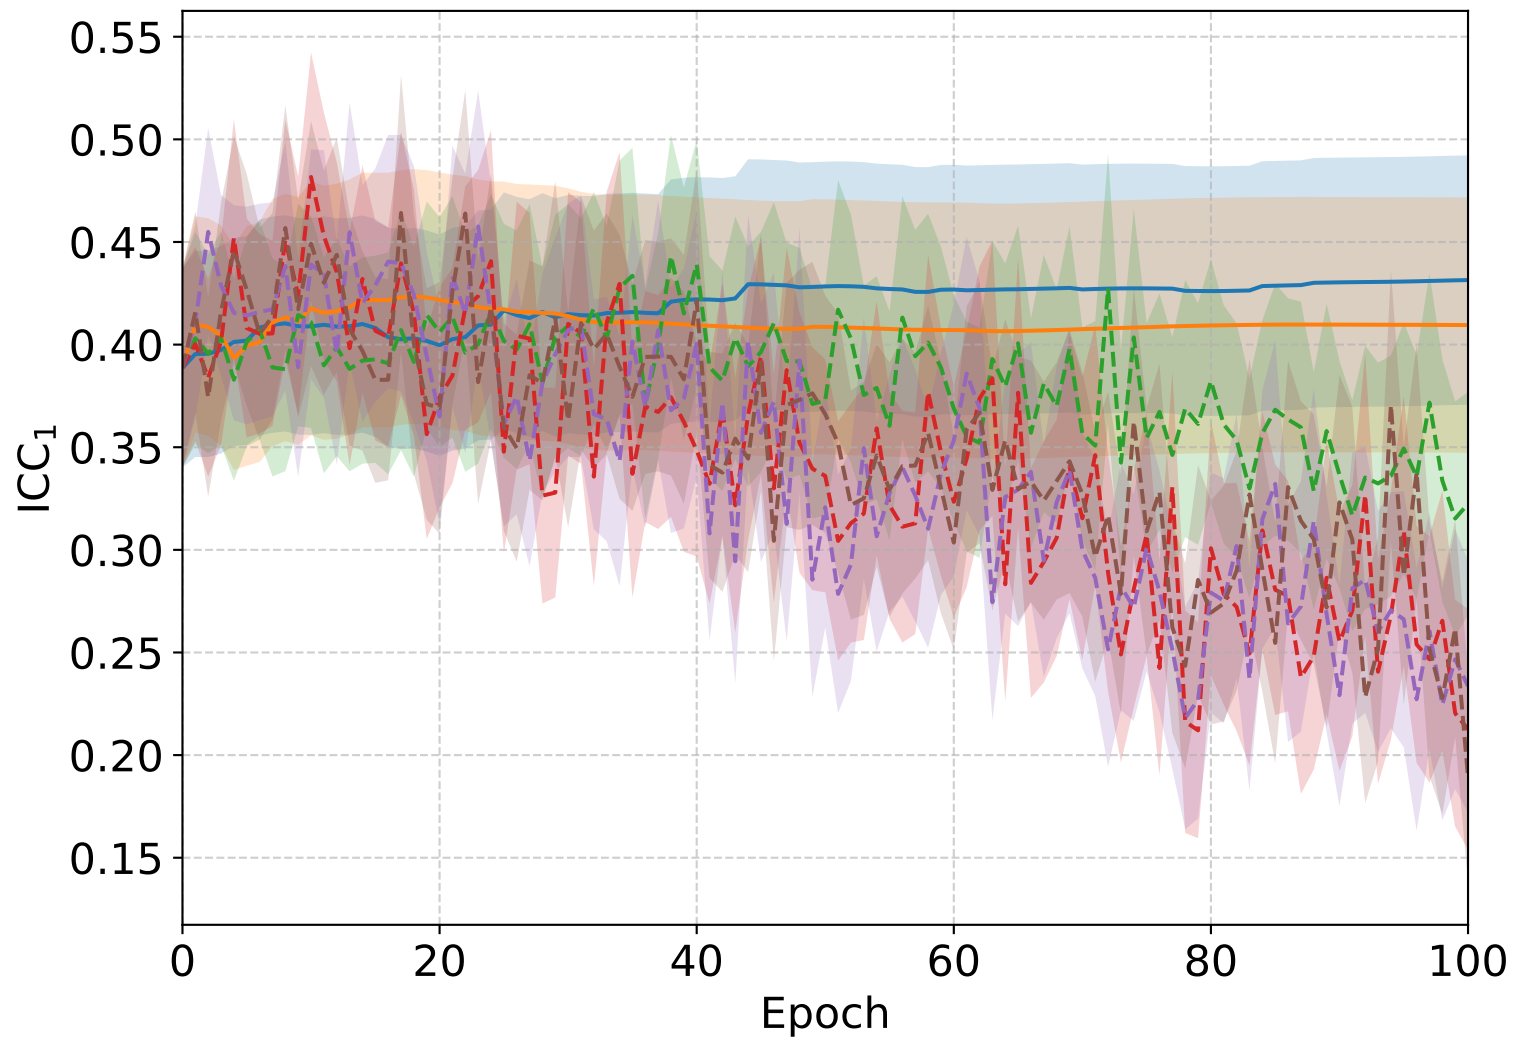

Supplement: supplementary_material [file losses_hid1_w_bias.pdf › blur_repo/toy_example/plots/losses_hid1_w_bias.pdf]

## Unbiased

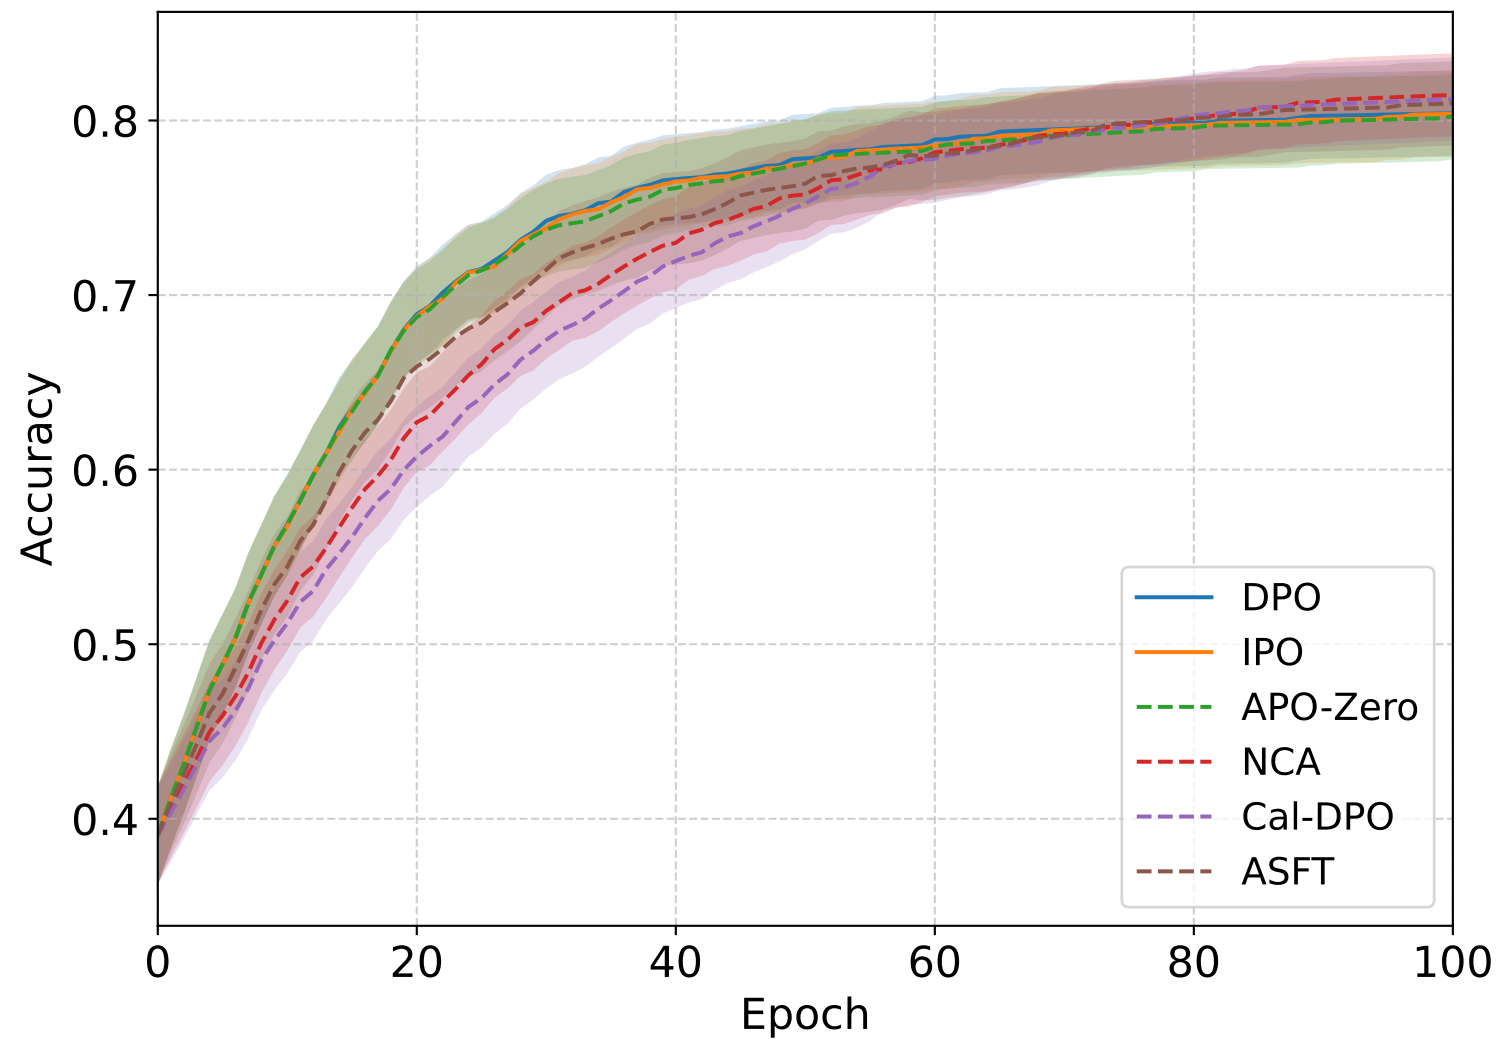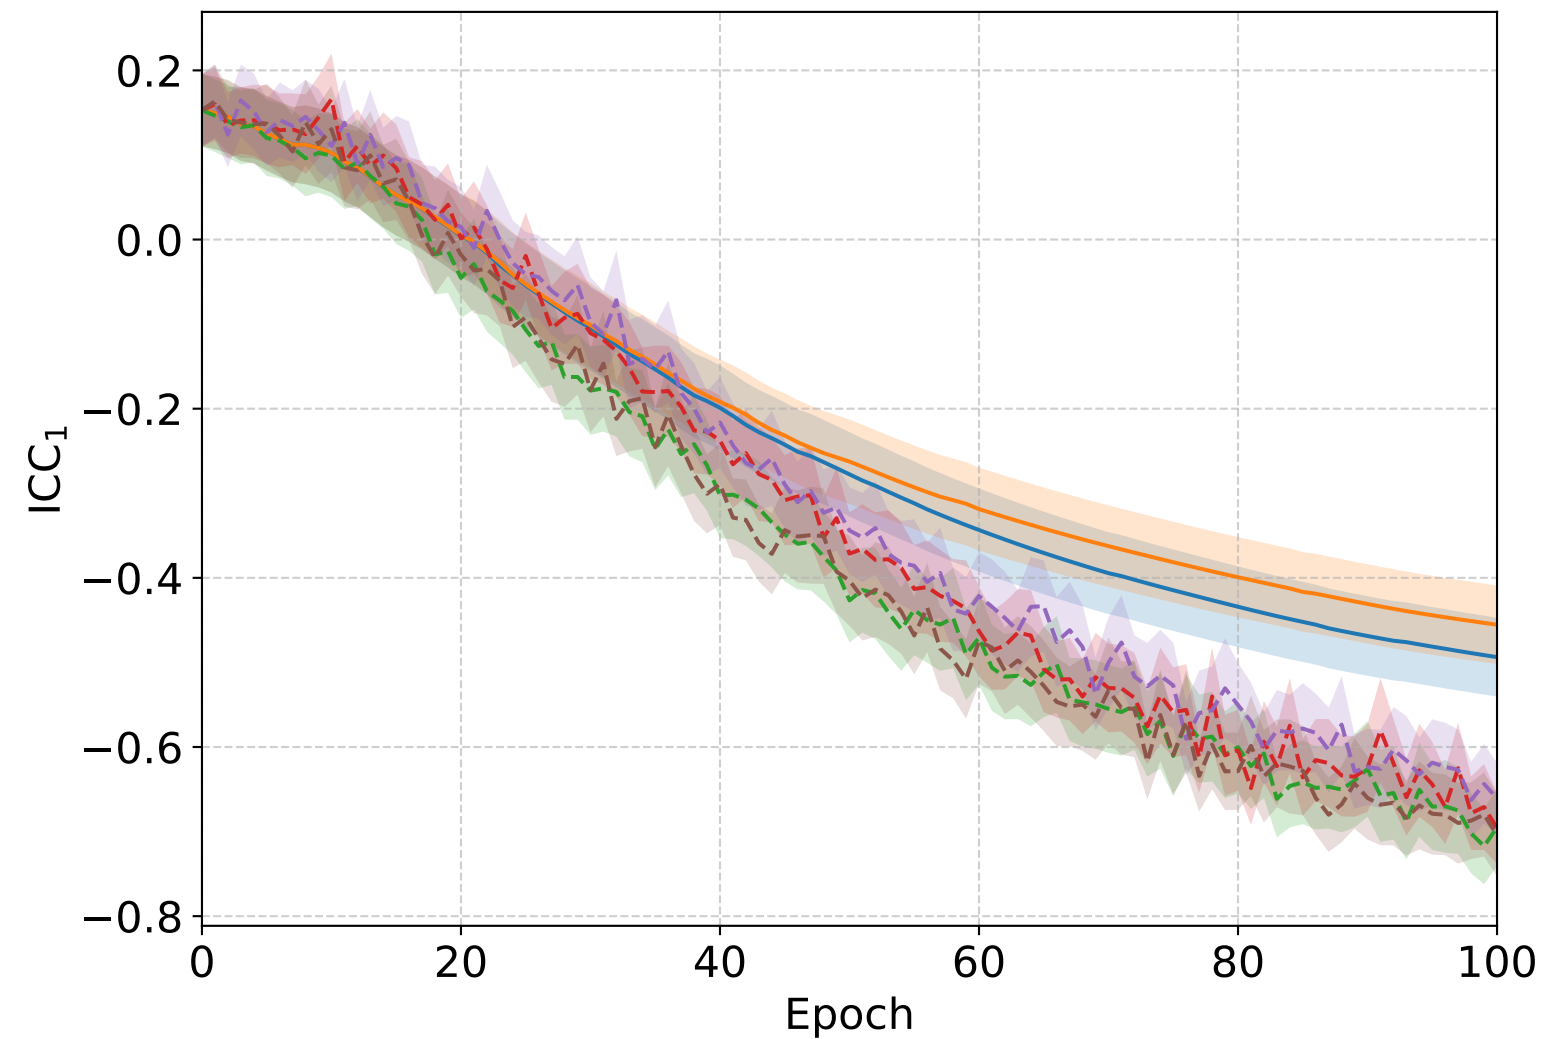

Supplement: supplementary_material [file losses_hid2_no_bias.pdf › blur_repo/toy_example/plots/losses_hid2_no_bias.pdf]

# Biased

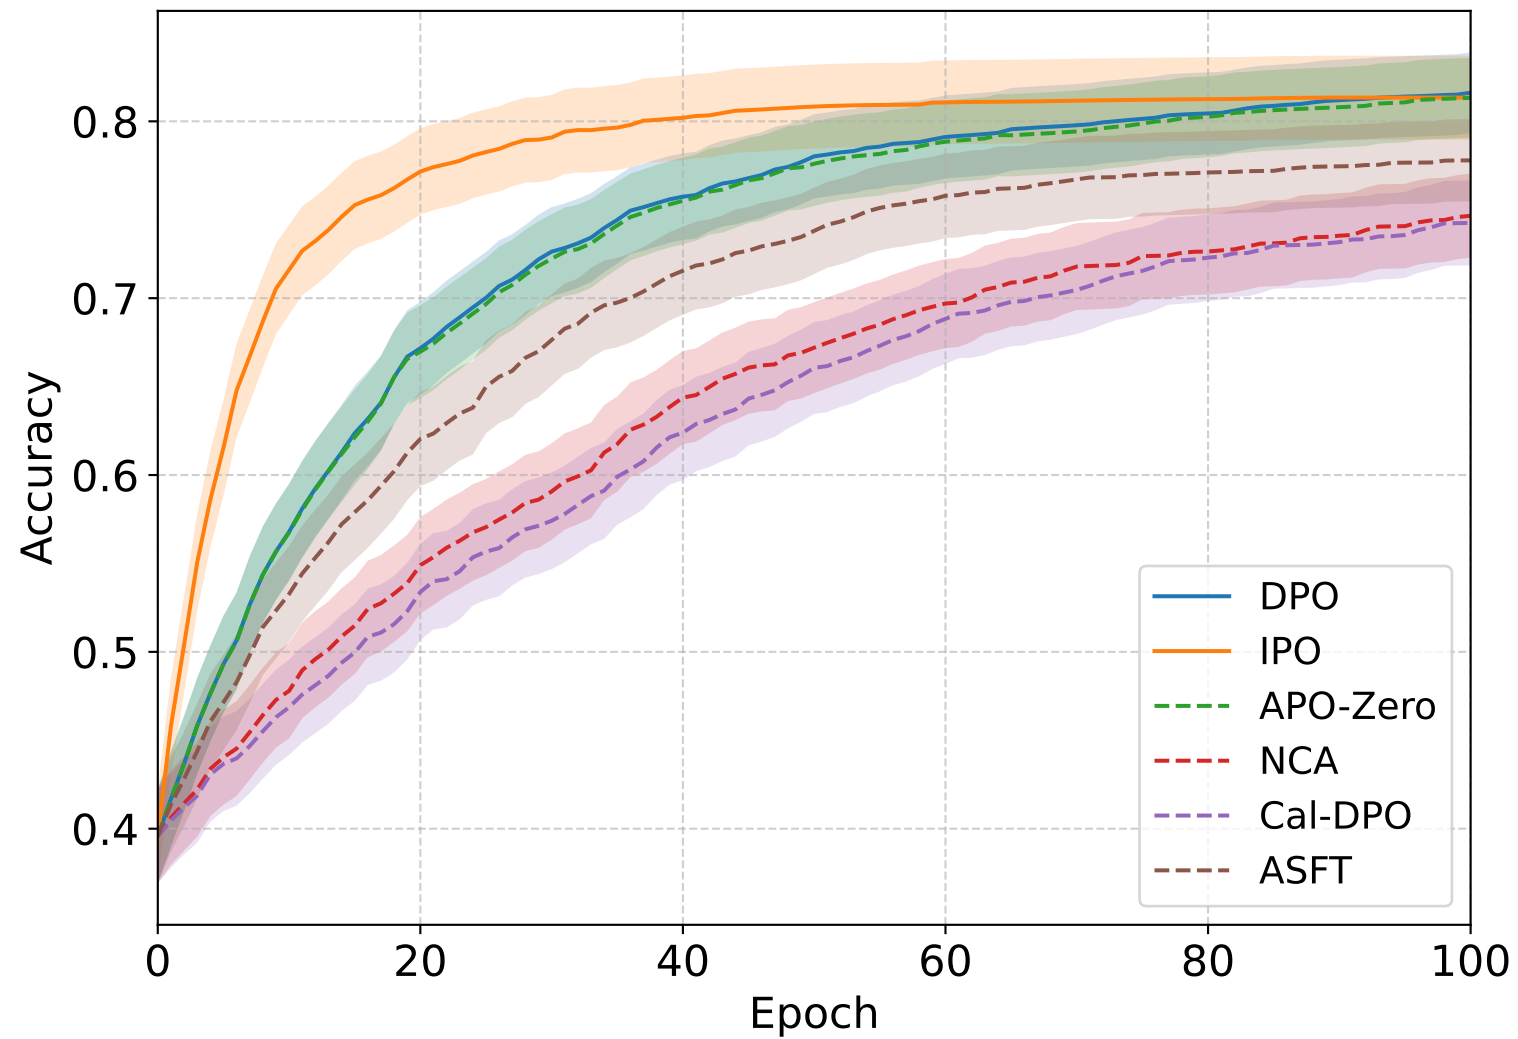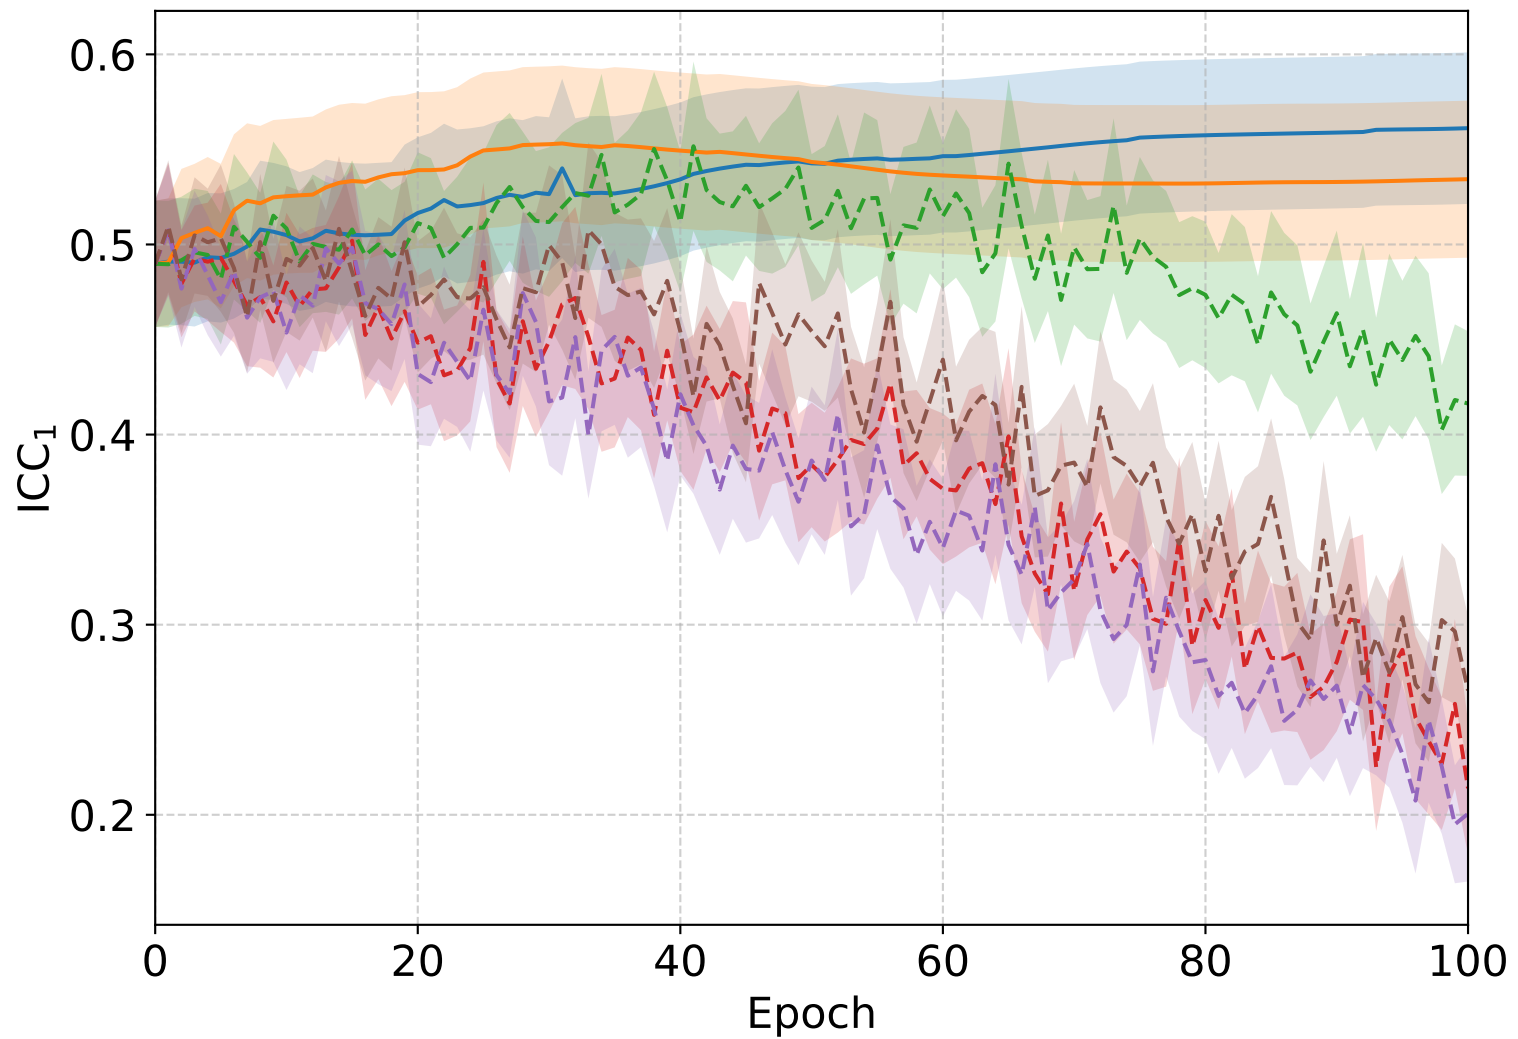

Supplement: supplementary_material [file losses_hid2_w_bias.pdf › blur_repo/toy_example/plots/losses_hid2_w_bias.pdf]

## Unbiased

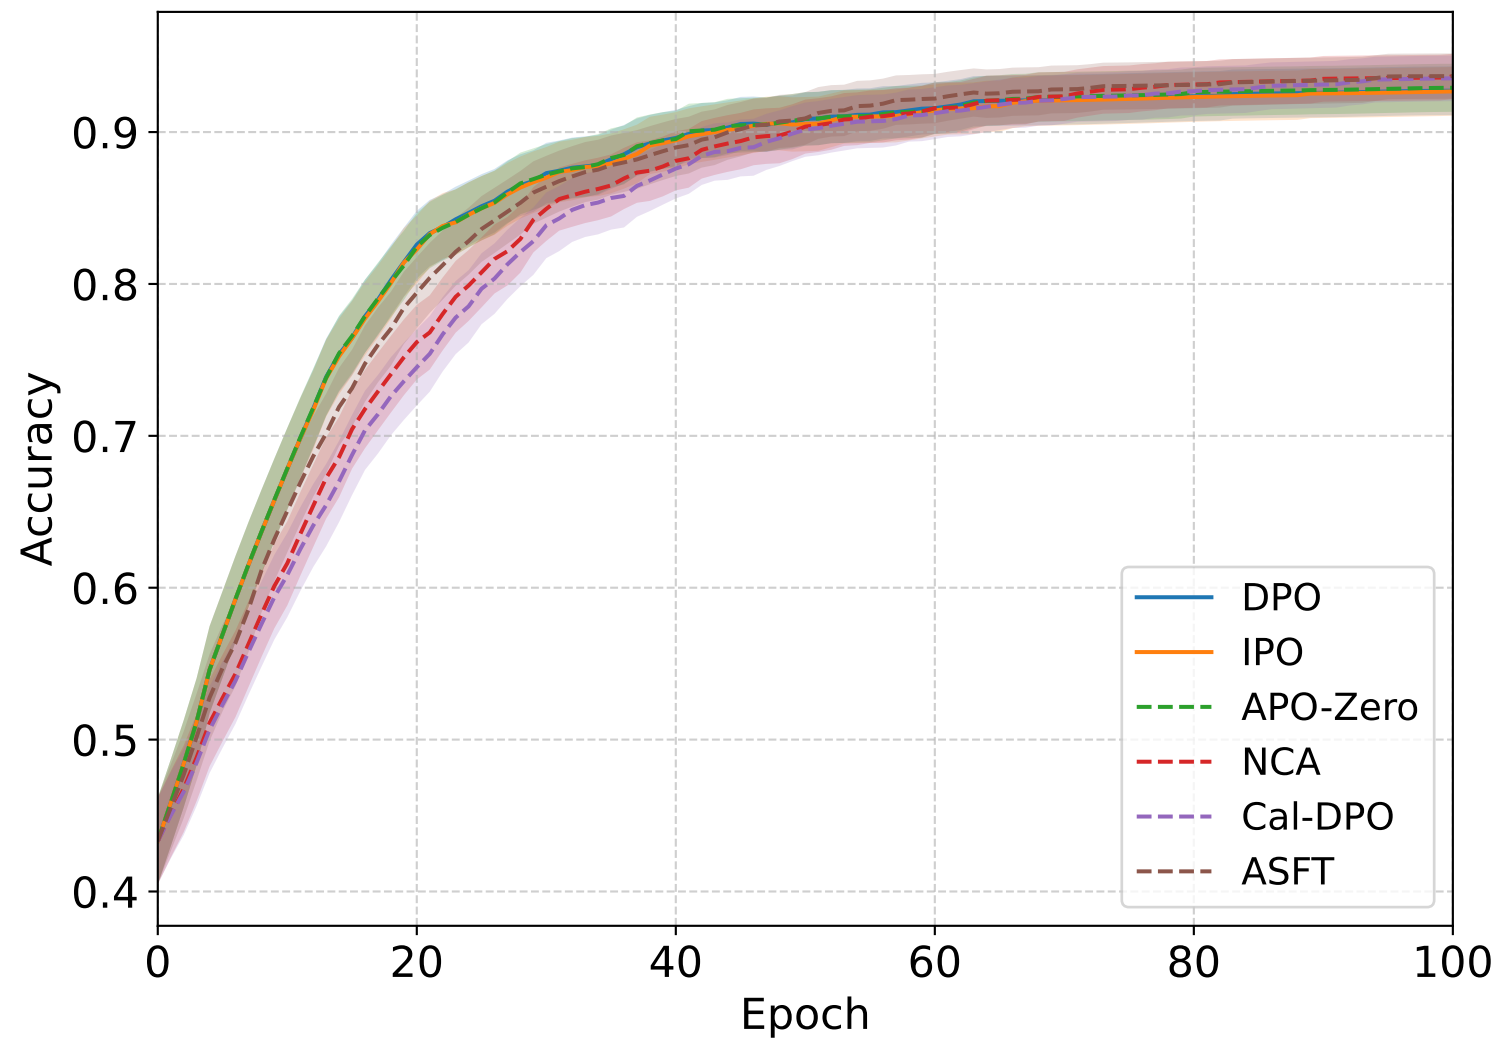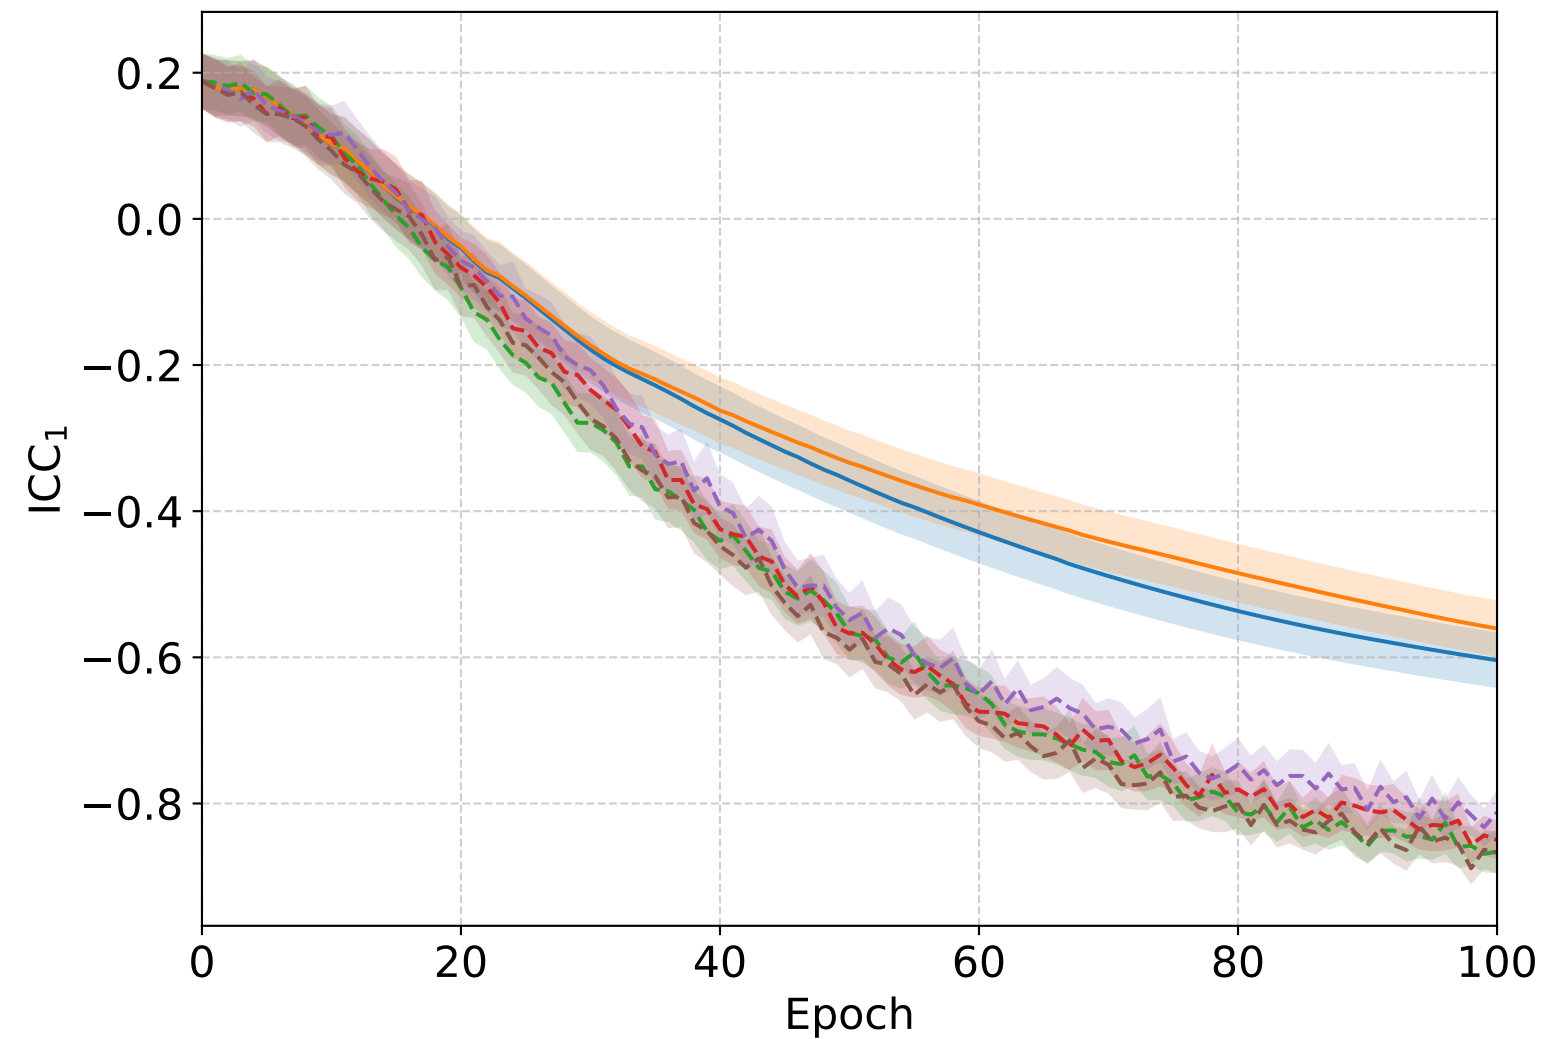

Supplement: supplementary_material [file losses_hid3_no_bias.pdf › blur_repo/toy_example/plots/losses_hid3_no_bias.pdf]

**Biased**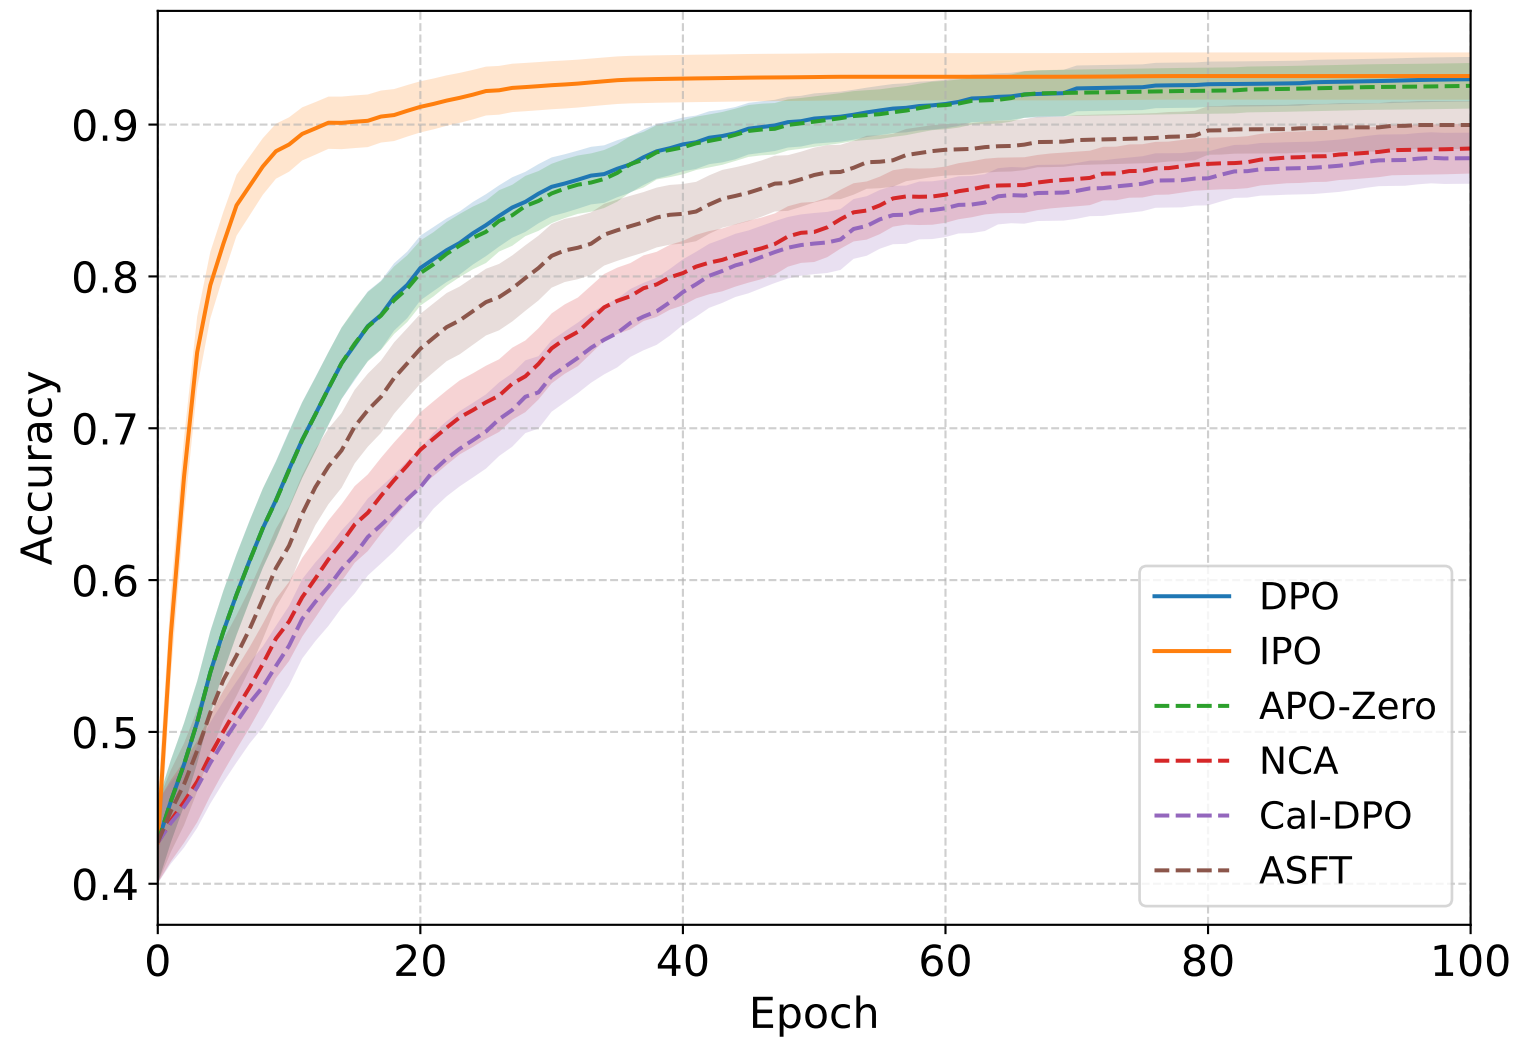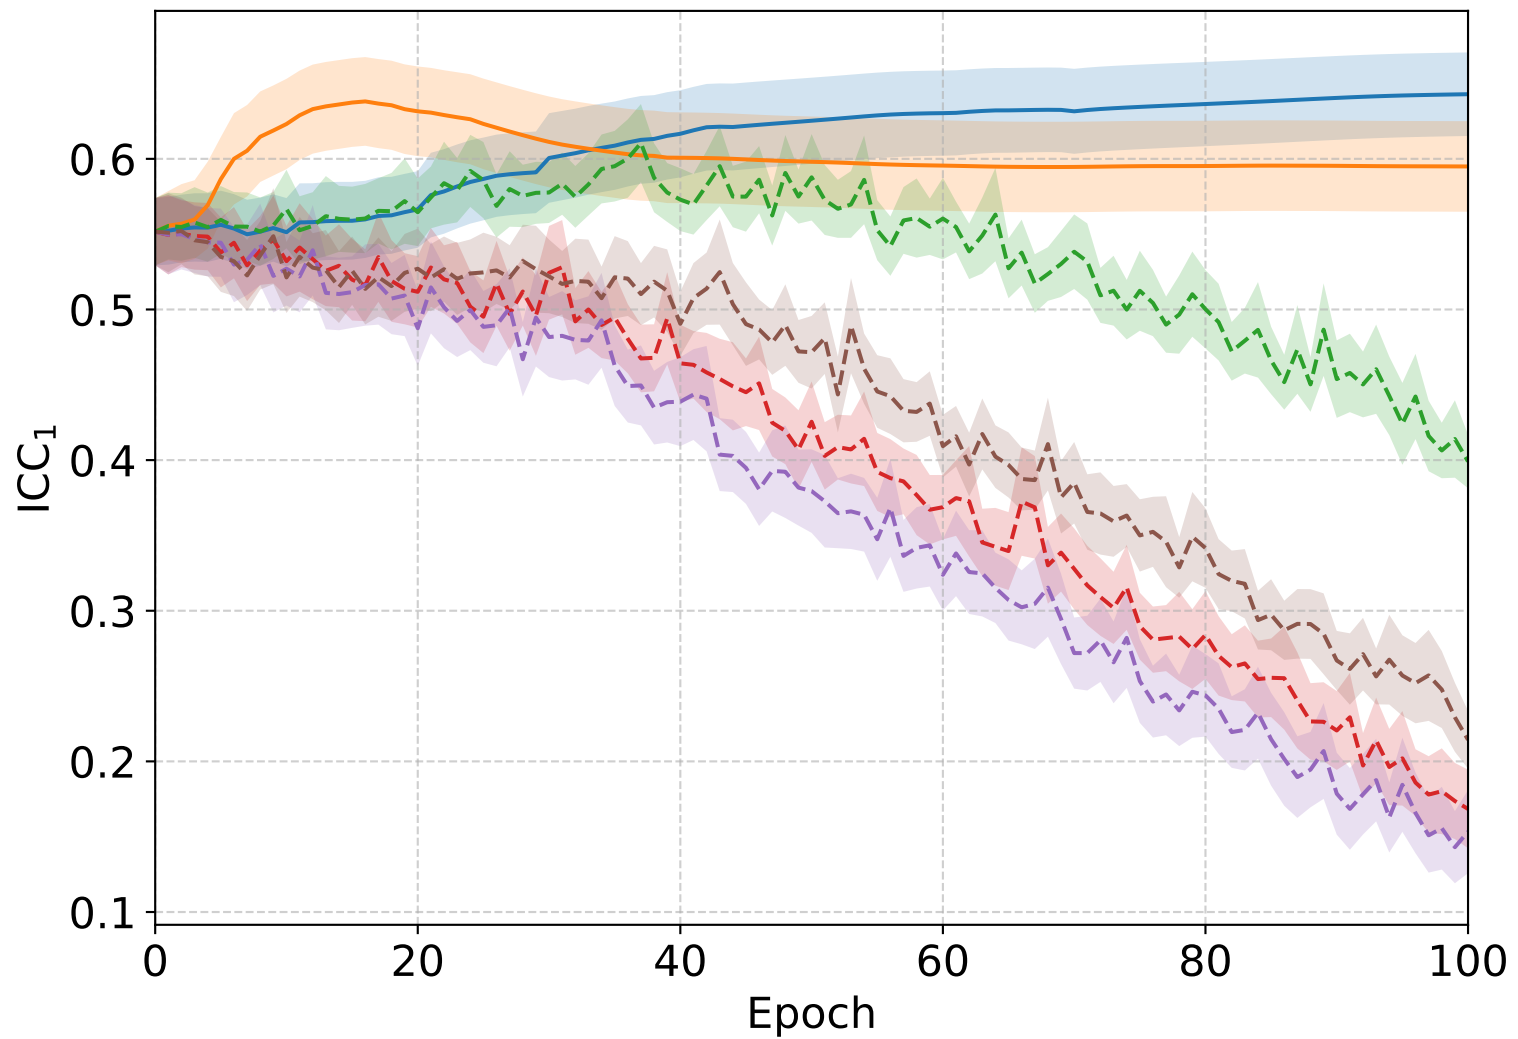

Supplement: supplementary_material [file losses_hid3_w_bias.pdf › blur_repo/toy_example/plots/losses_hid3_w_bias.pdf]

## Unbiased

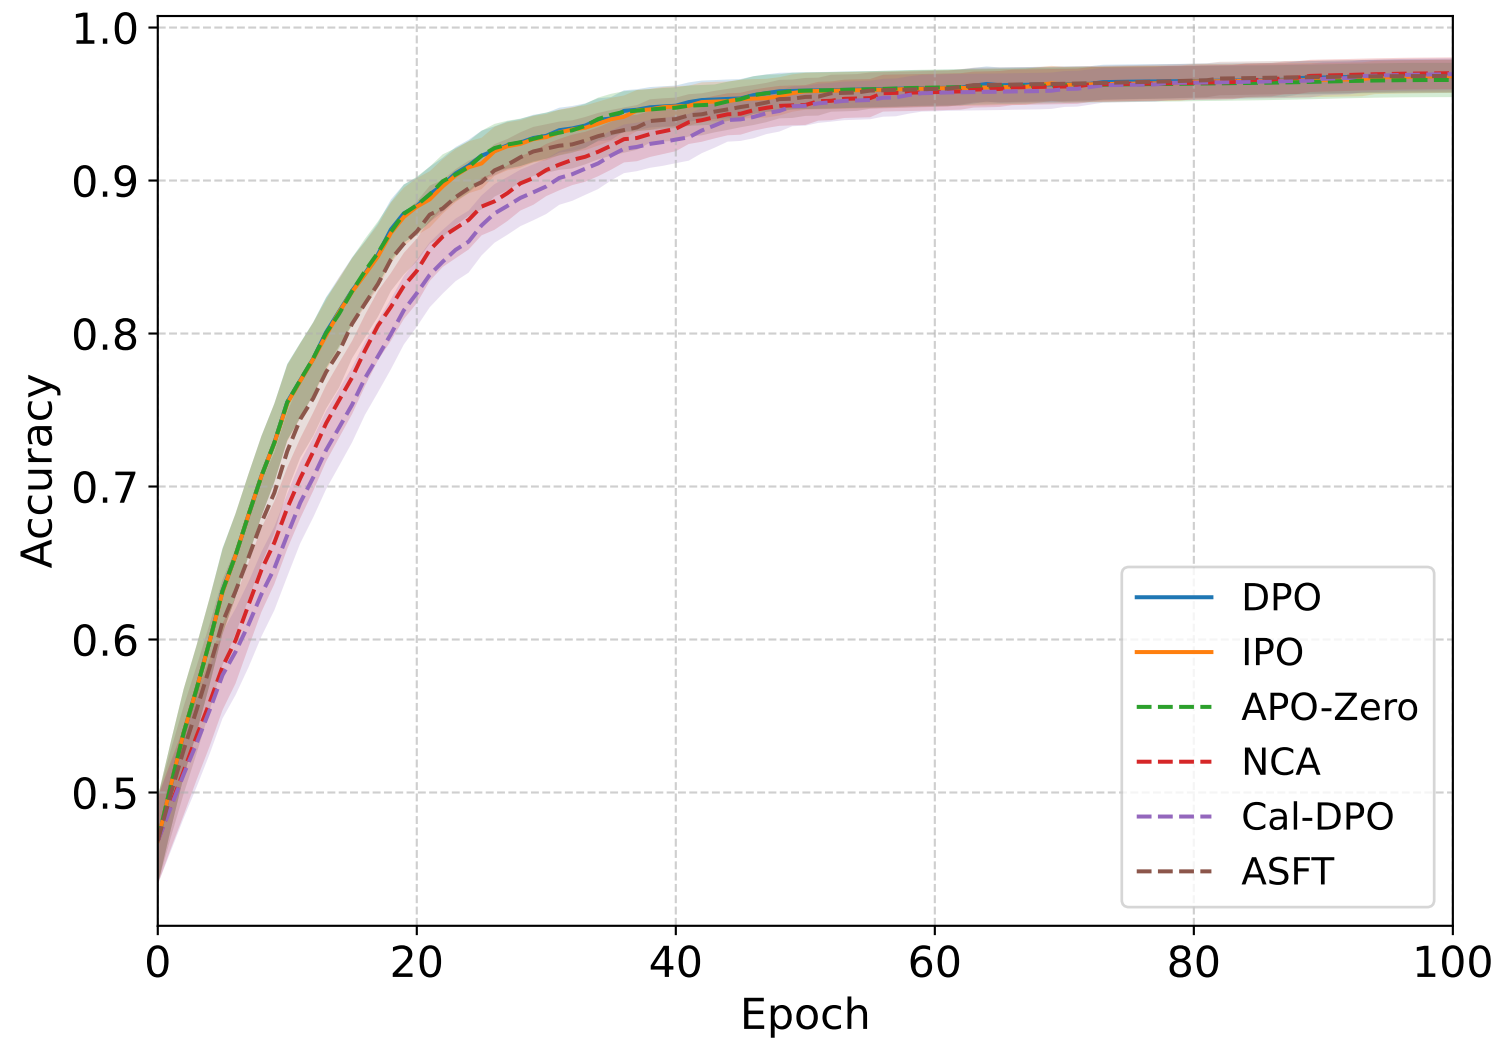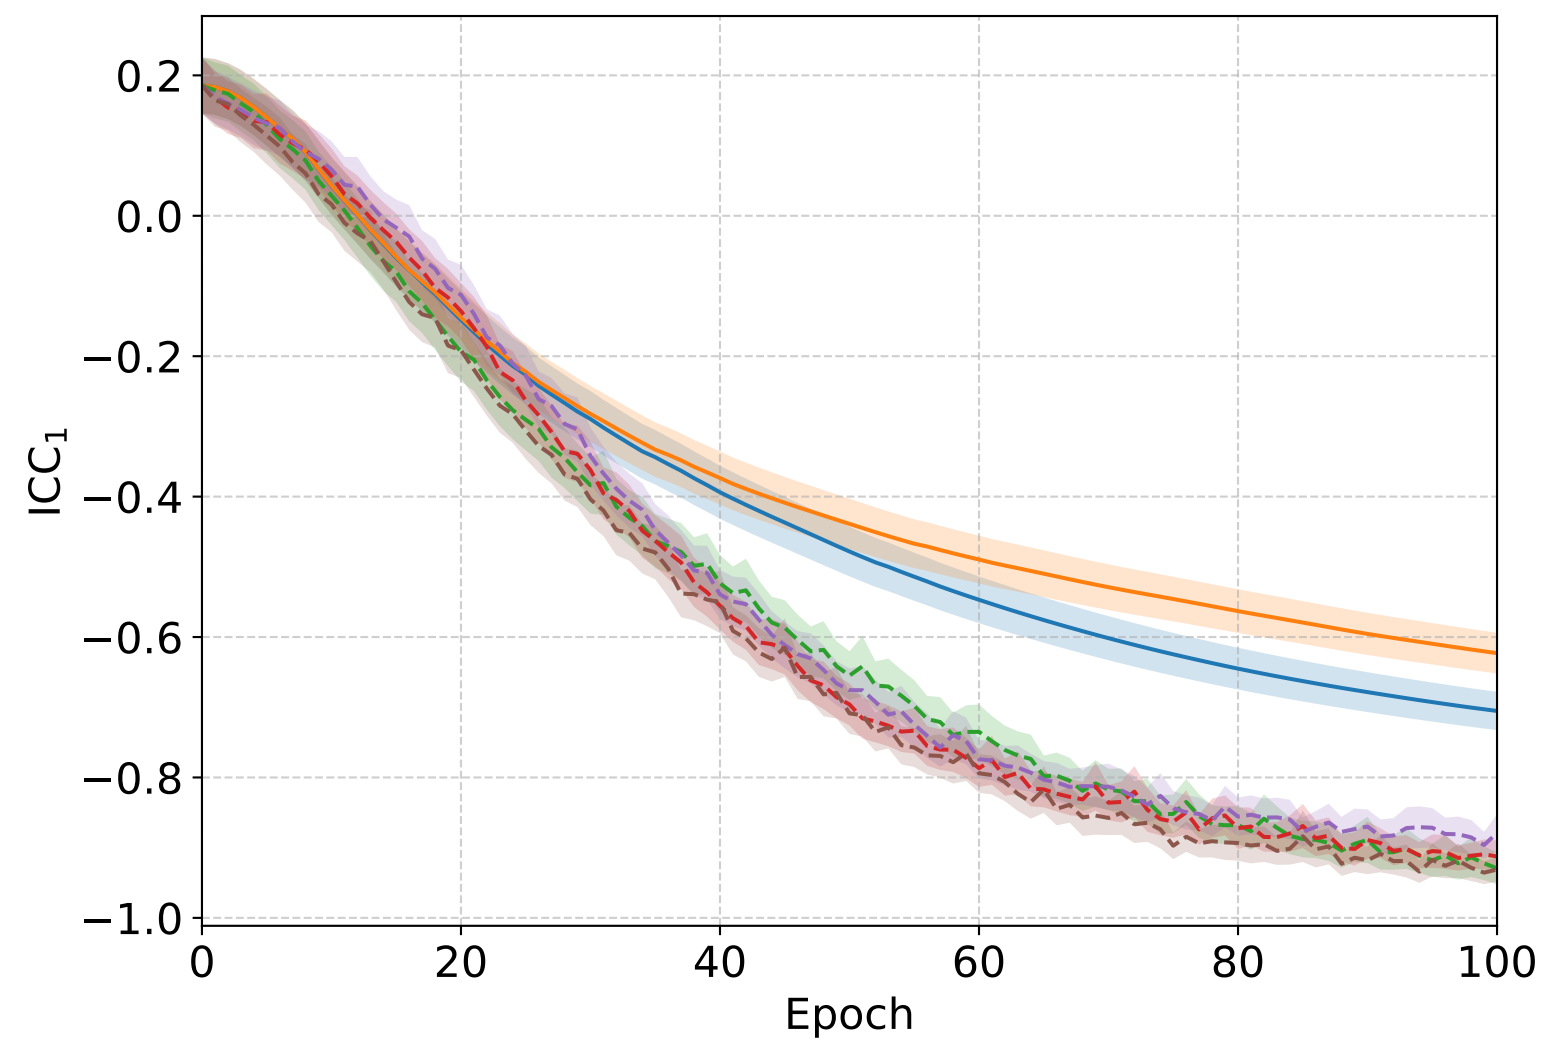

Supplement: supplementary_material [file losses_hid4_no_bias.pdf › blur_repo/toy_example/plots/losses_hid4_no_bias.pdf]

**Biased**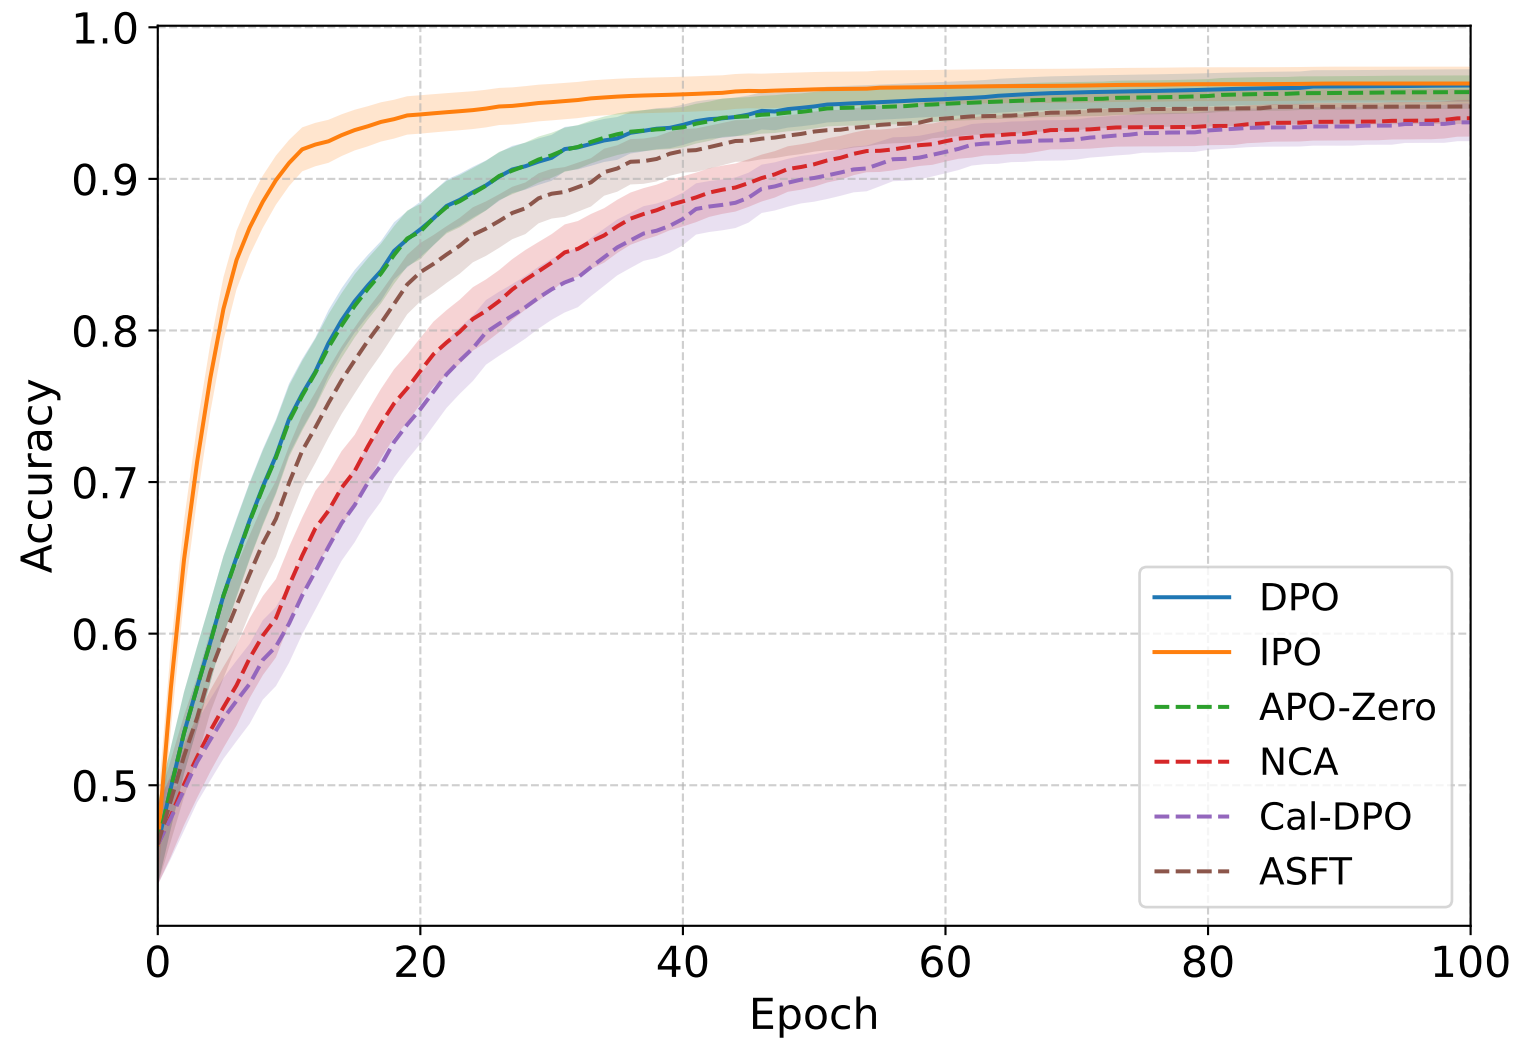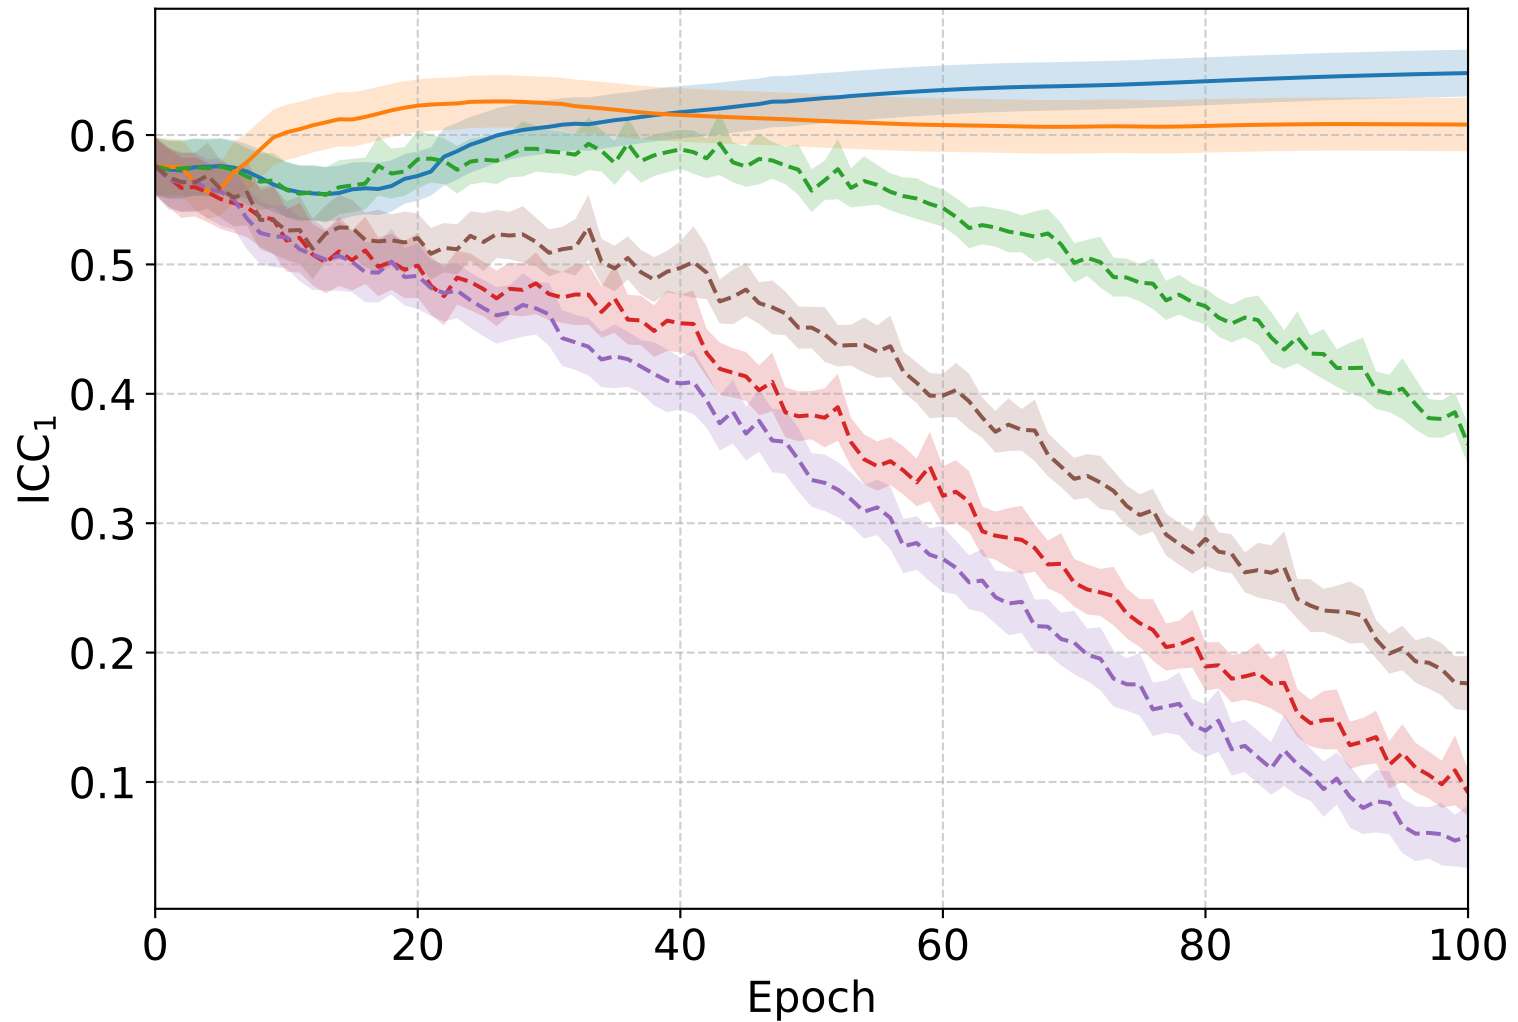

Supplement: supplementary_material [file losses_hid4_w_bias.pdf › blur_repo/toy_example/plots/losses_hid4_w_bias.pdf]

## Unbiased

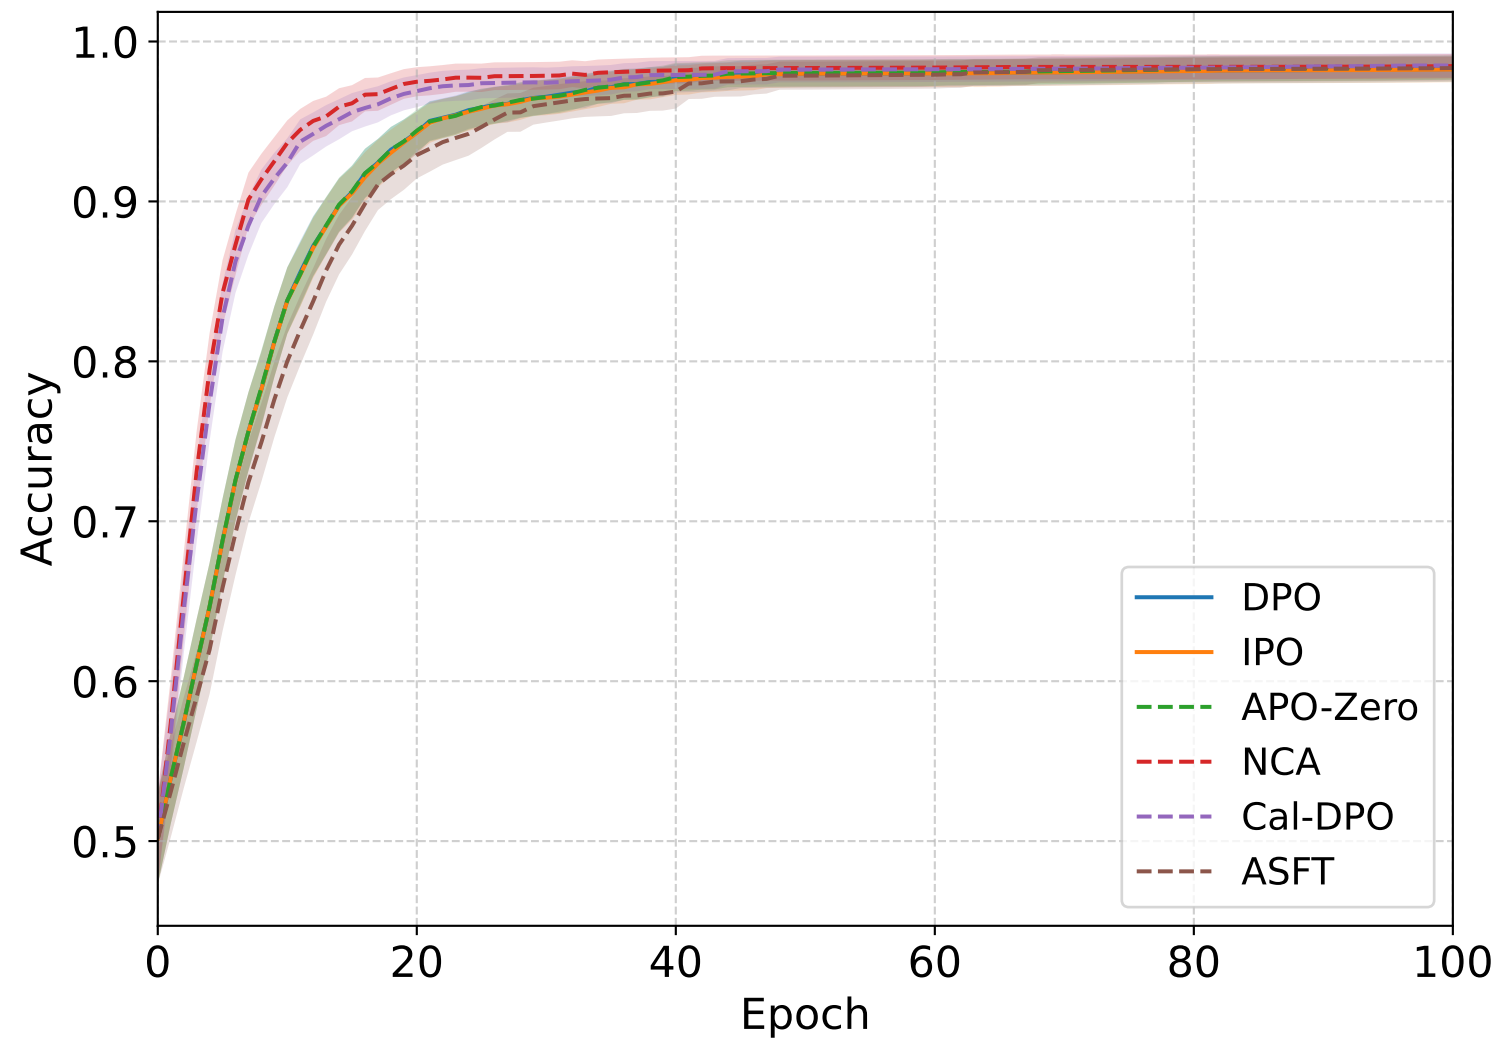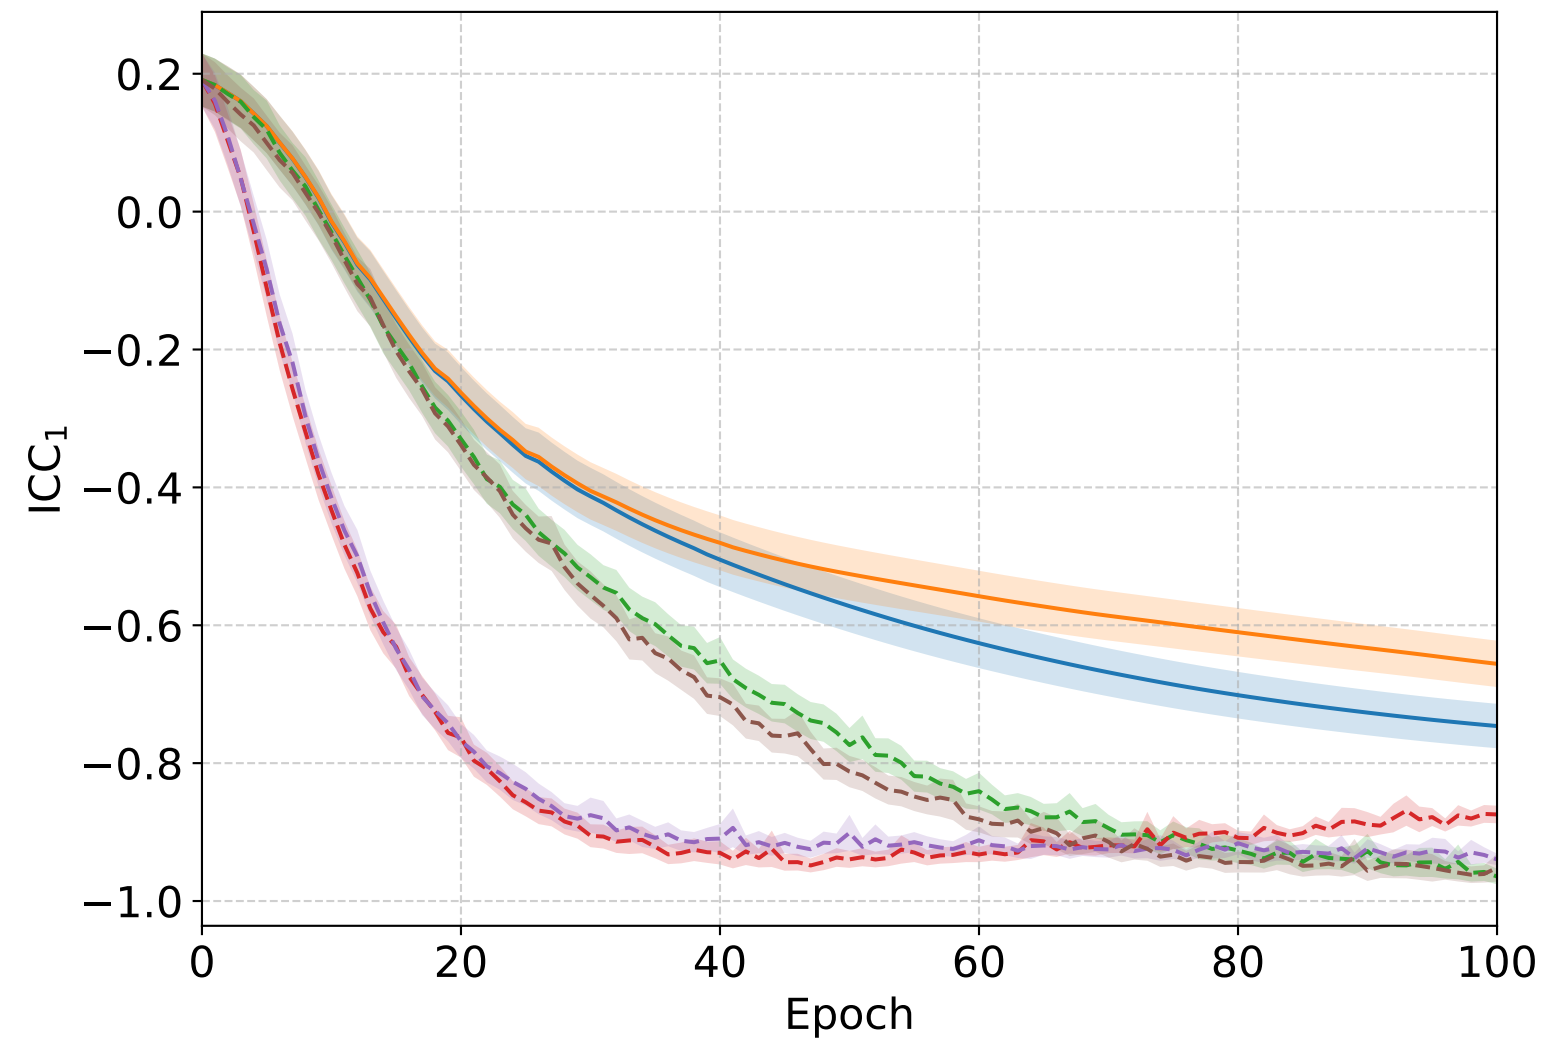

Supplement: supplementary_material [file losses_hid5_no_bias.pdf › blur_repo/toy_example/plots/losses_hid5_no_bias.pdf]

**Biased**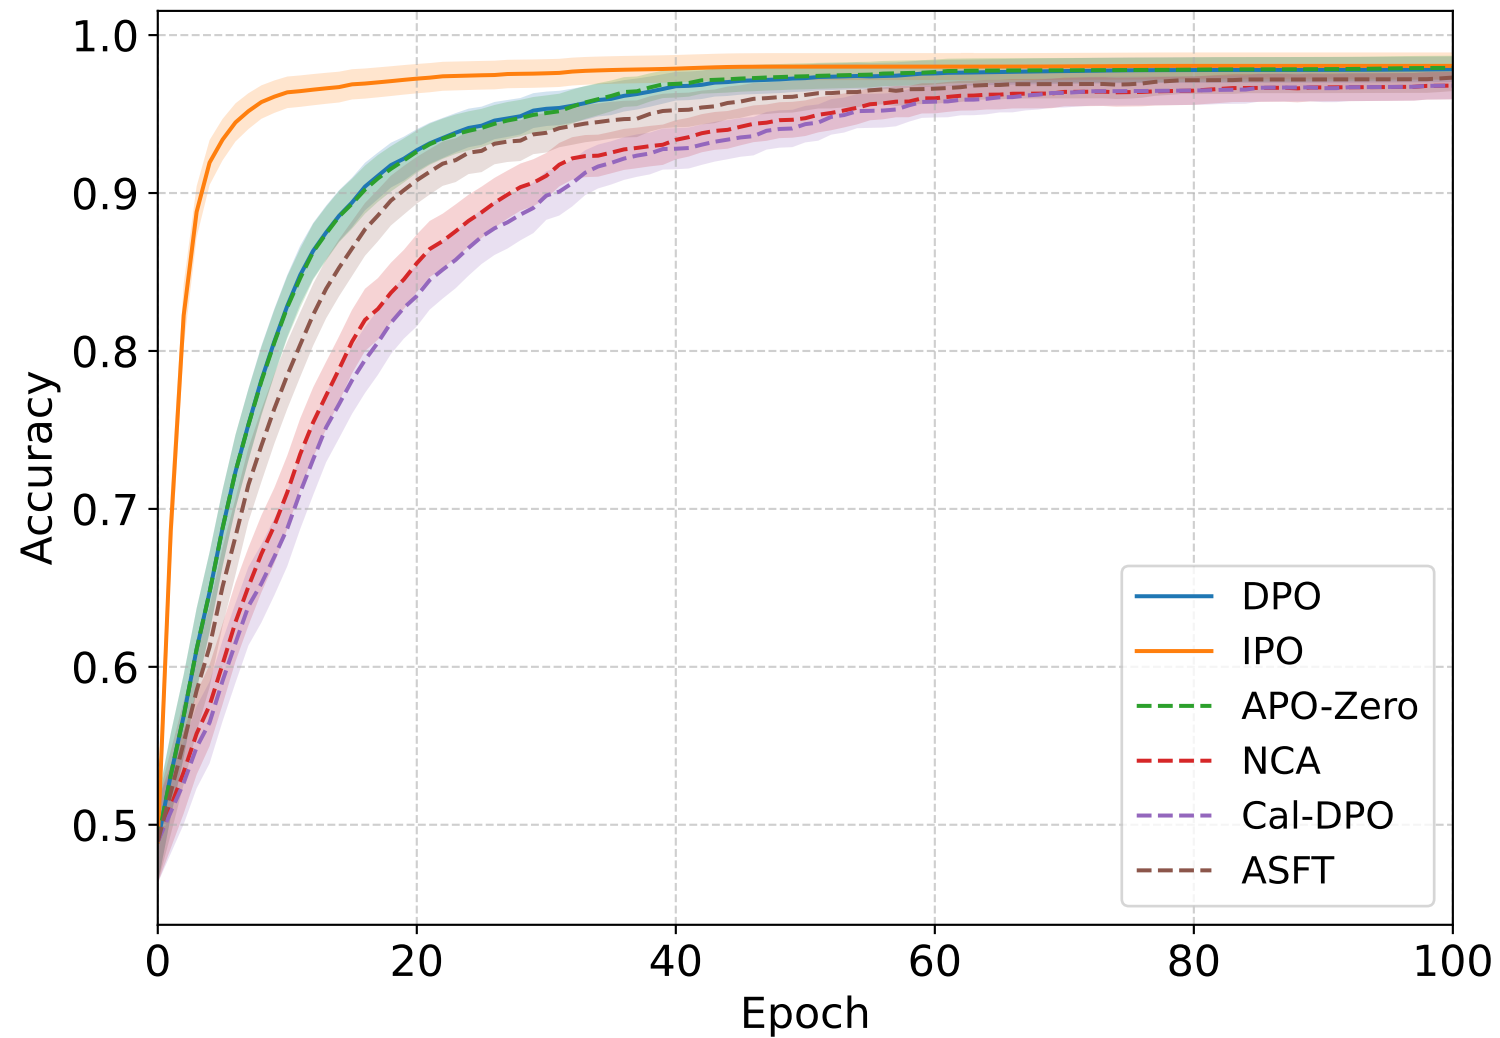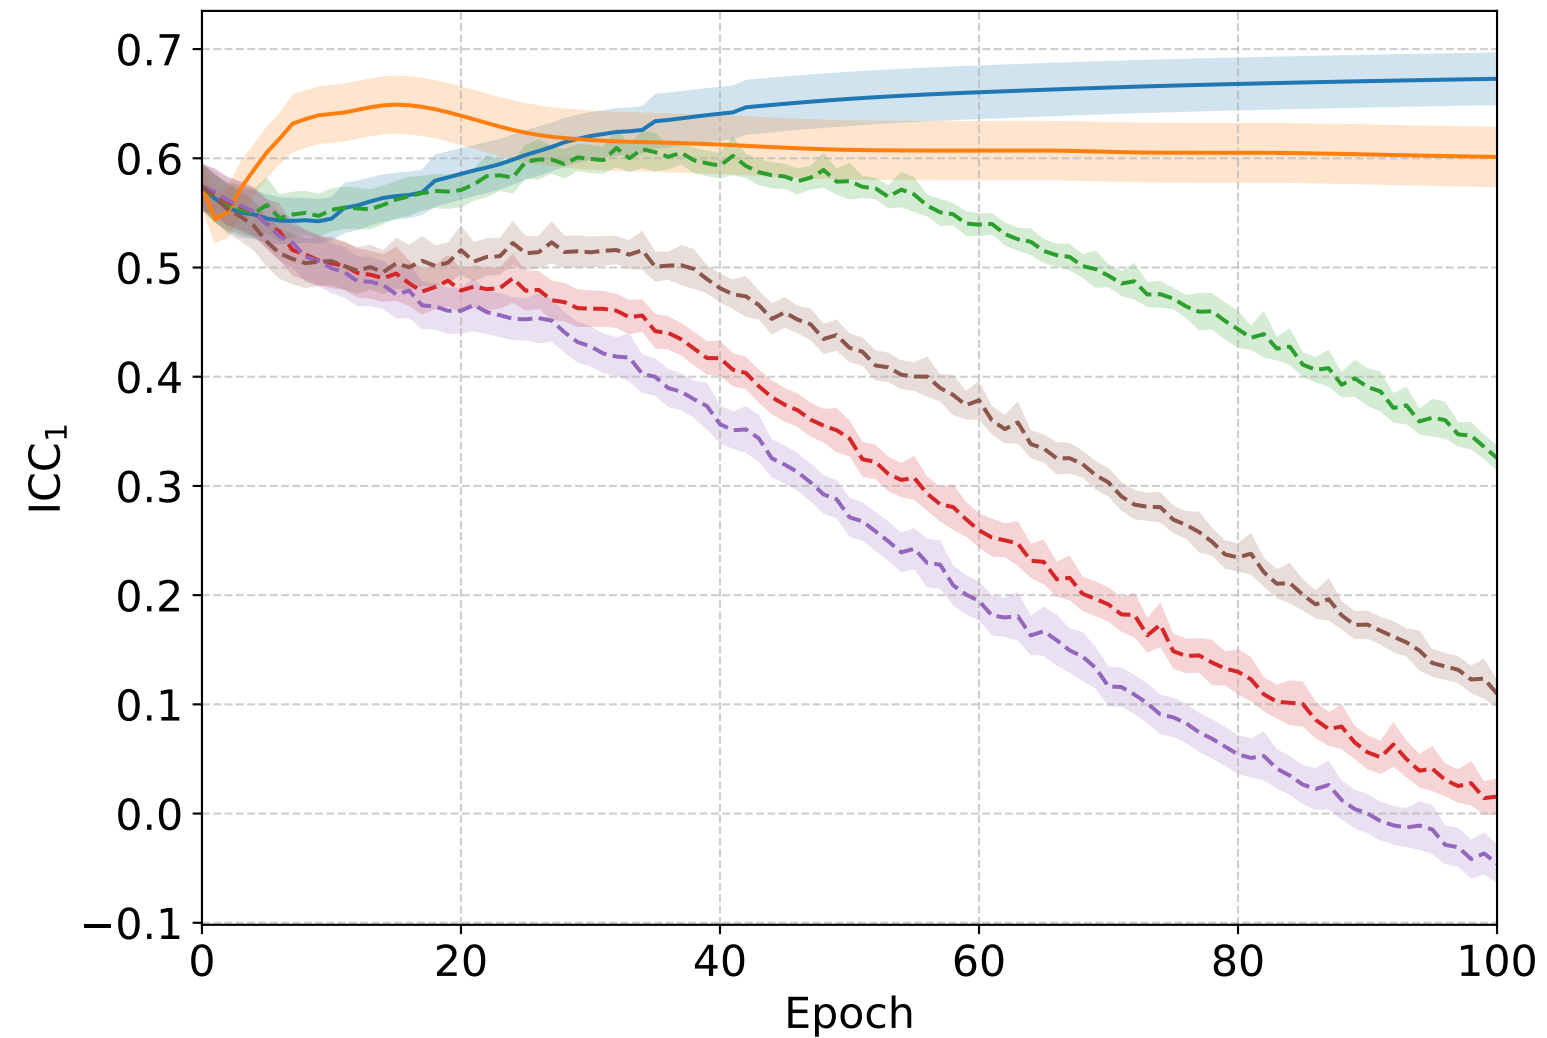

Supplement: supplementary_material [file losses_hid5_w_bias.pdf › blur_repo/toy_example/plots/losses_hid5_w_bias.pdf]

## Unbiased

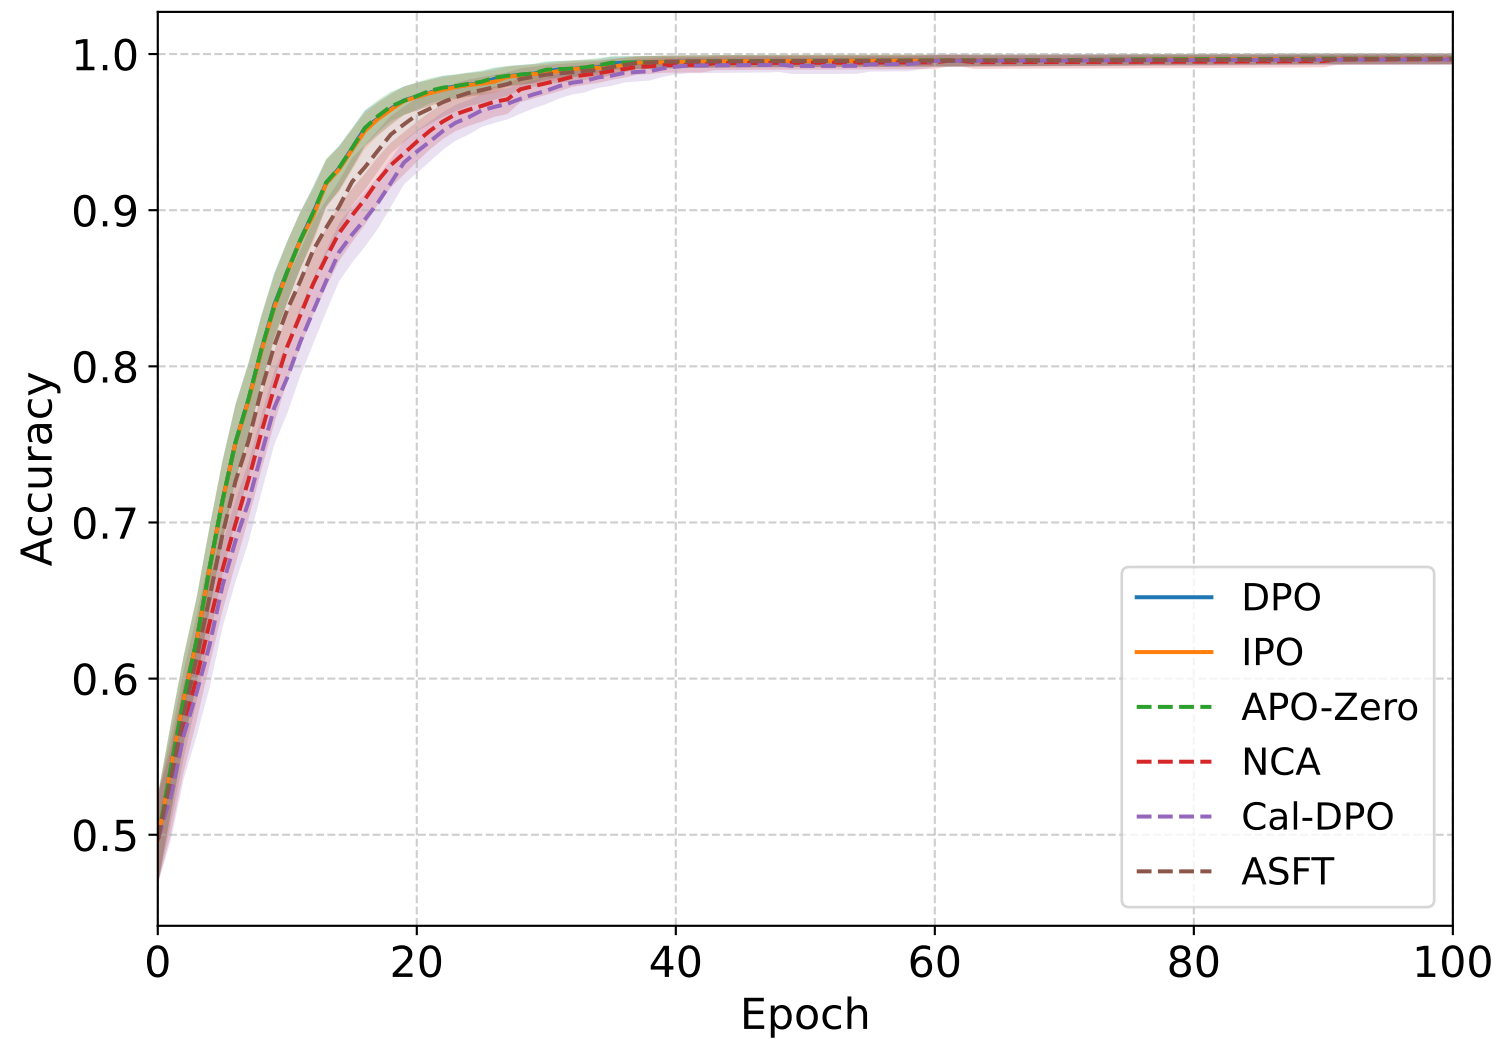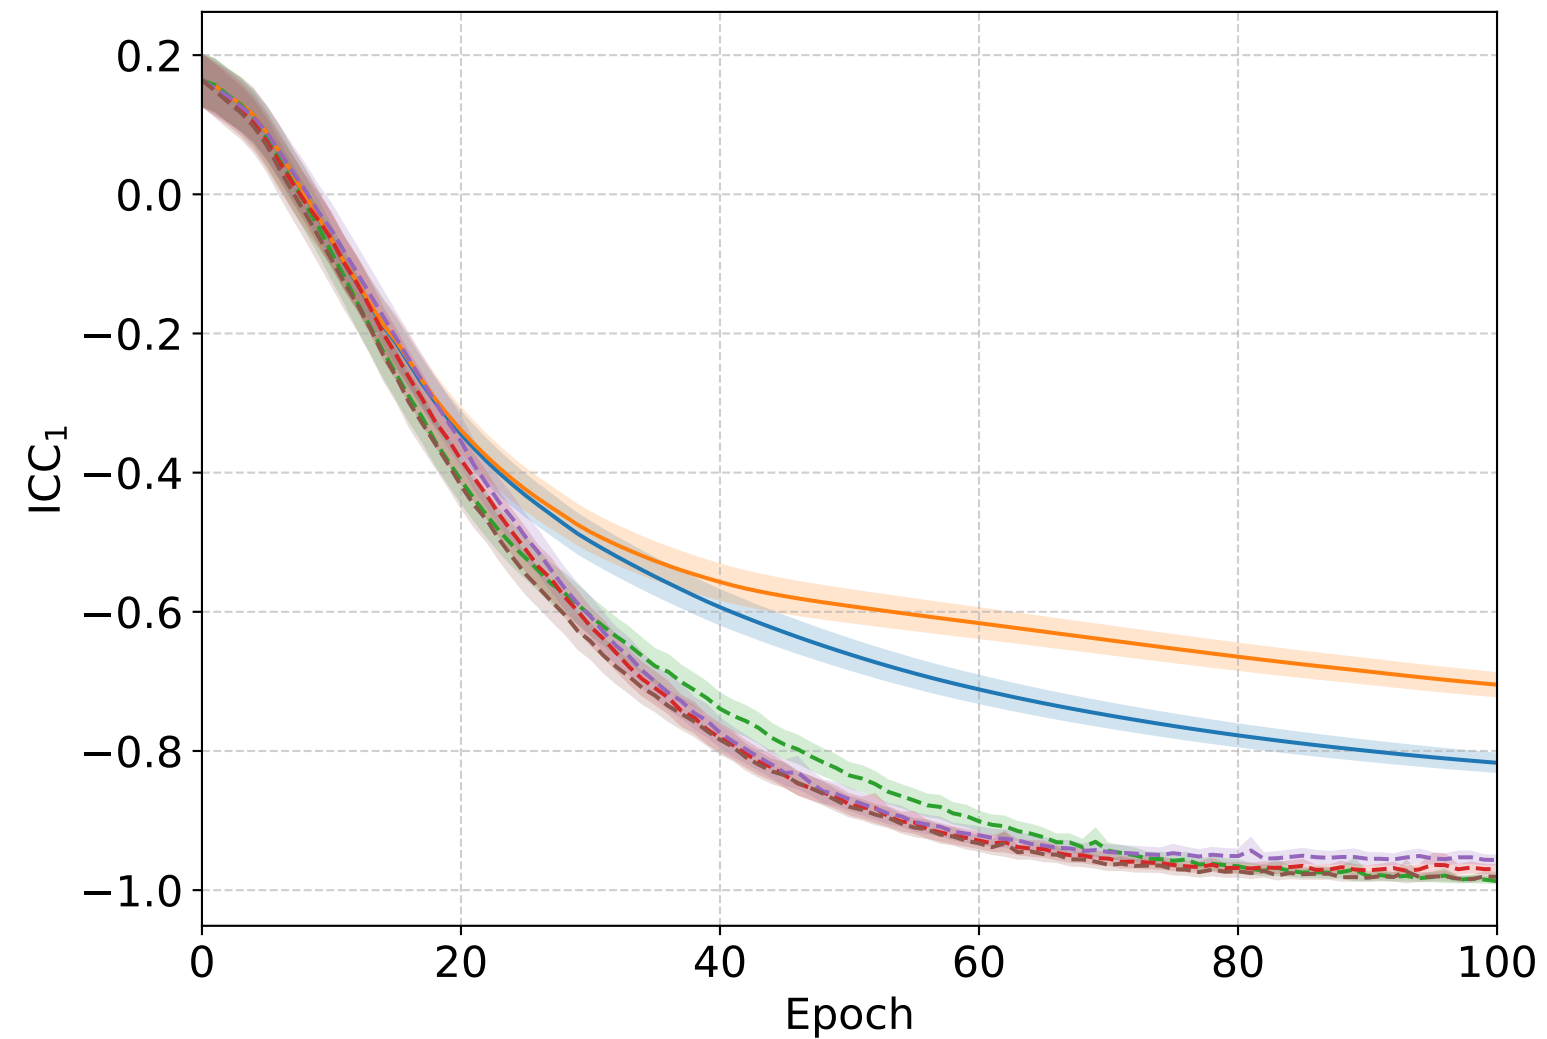

Supplement: supplementary_material [file losses_hid6_no_bias.pdf › blur_repo/toy_example/plots/losses_hid6_no_bias.pdf]

**Biased**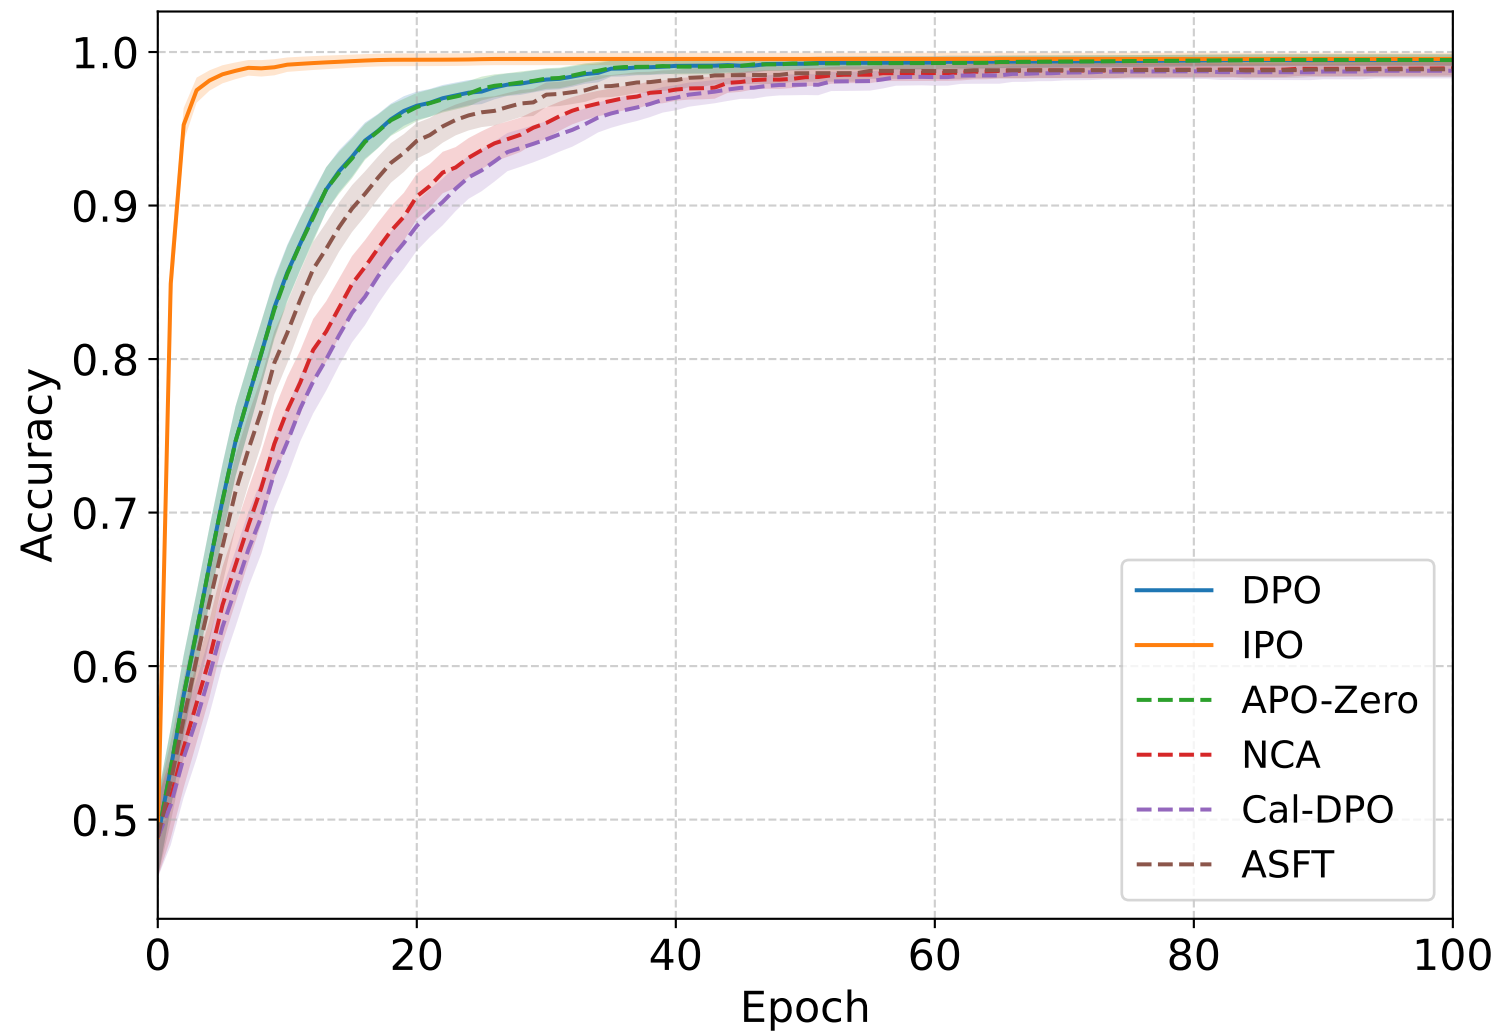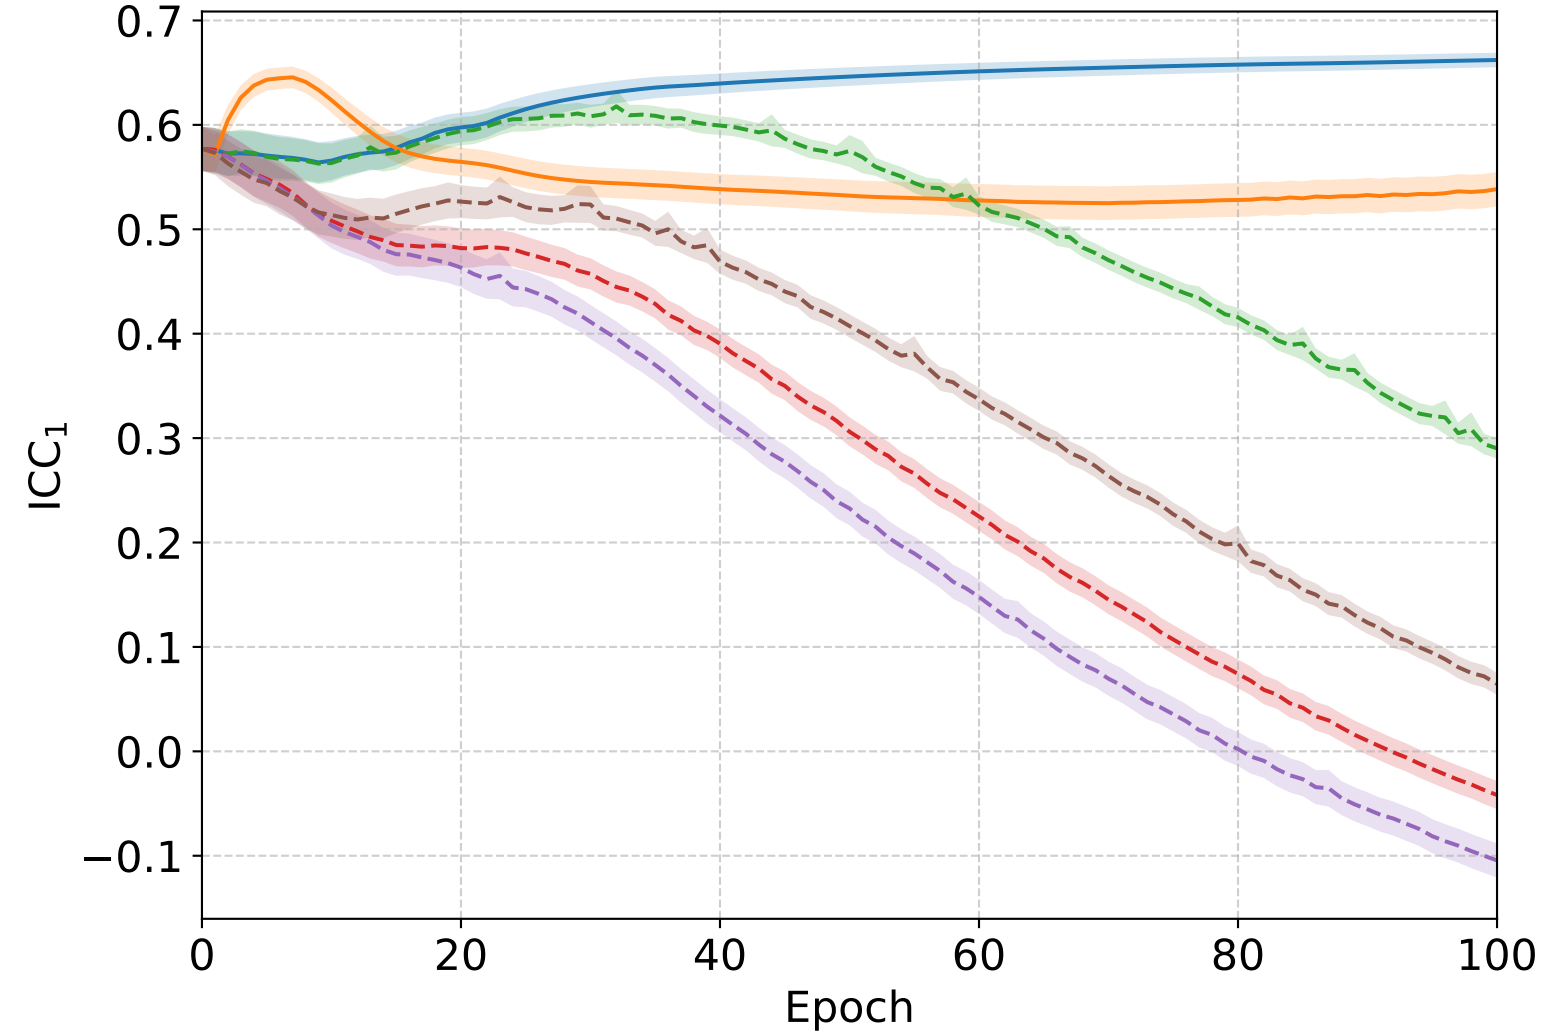

Supplement: supplementary_material [file losses_hid6_w_bias.pdf › blur_repo/toy_example/plots/losses_hid6_w_bias.pdf]

## Unbiased

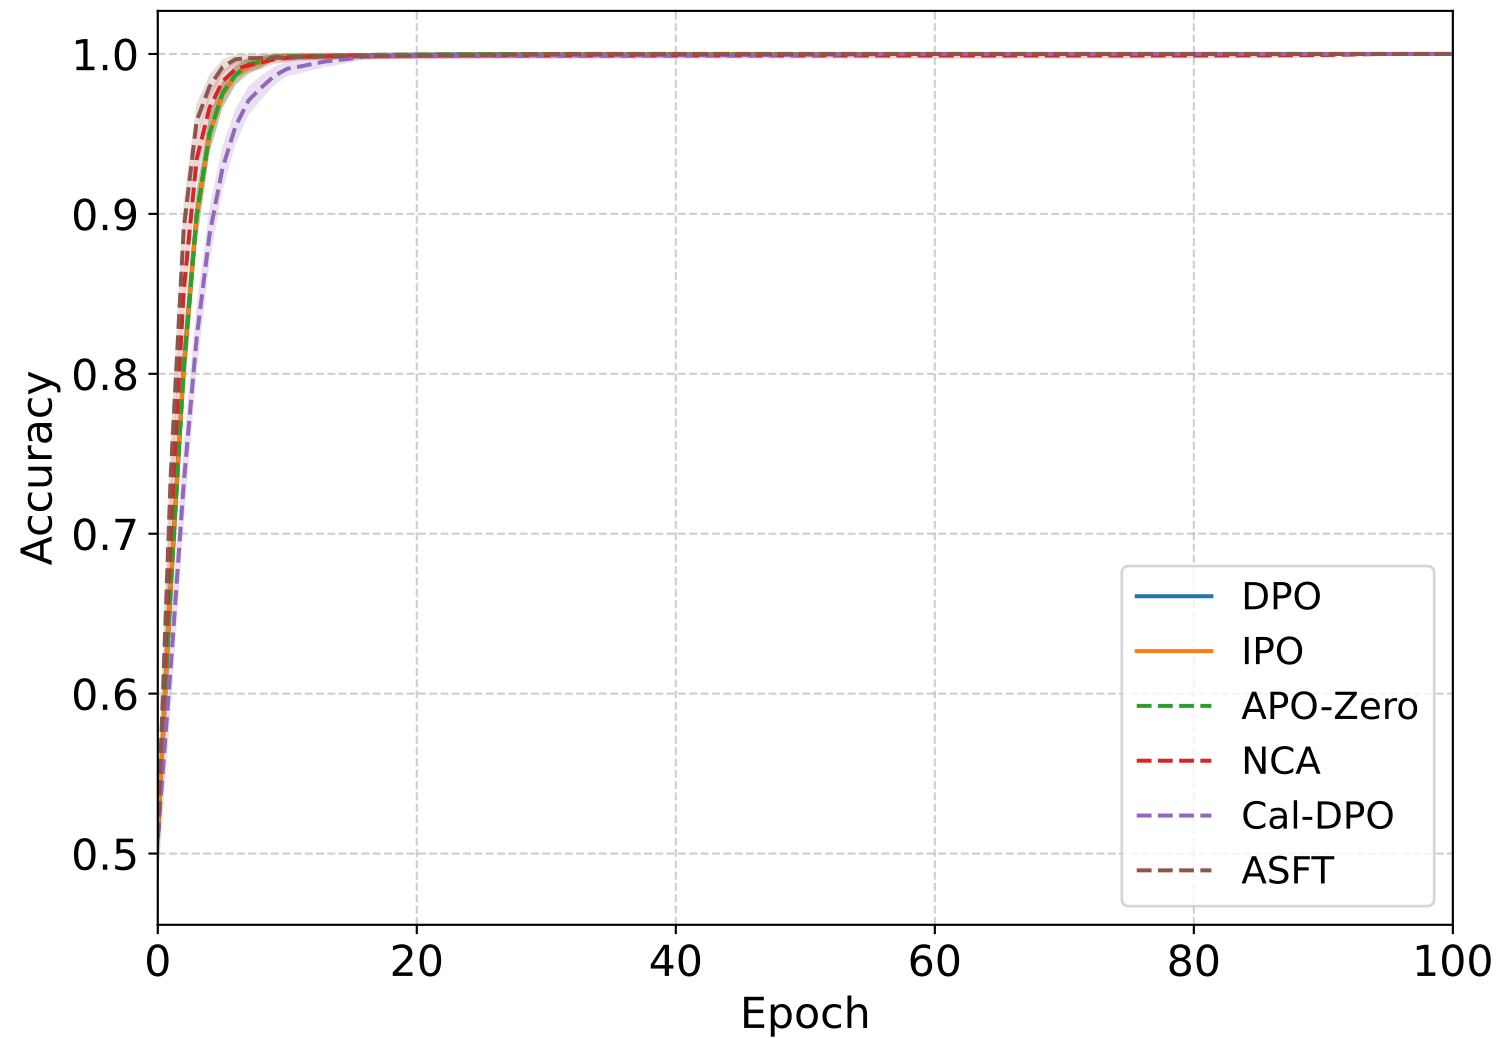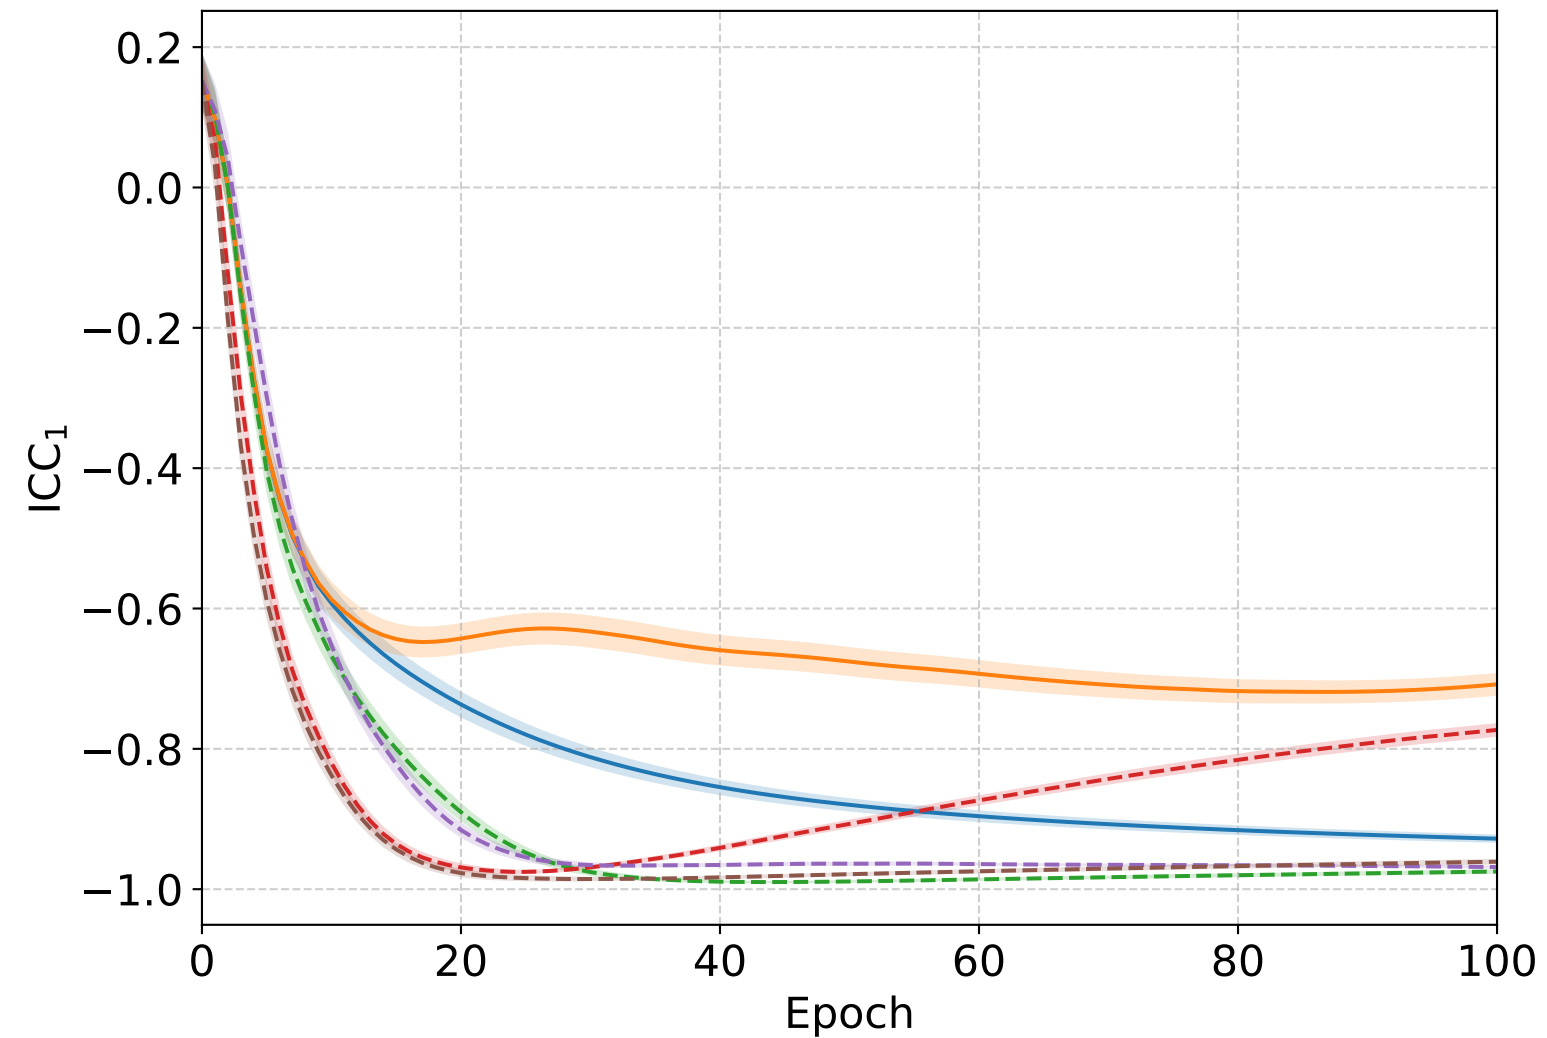

Supplement: supplementary_material [file losses_hid8_no_bias.pdf › blur_repo/toy_example/plots/losses_hid8_no_bias.pdf]

## Biased

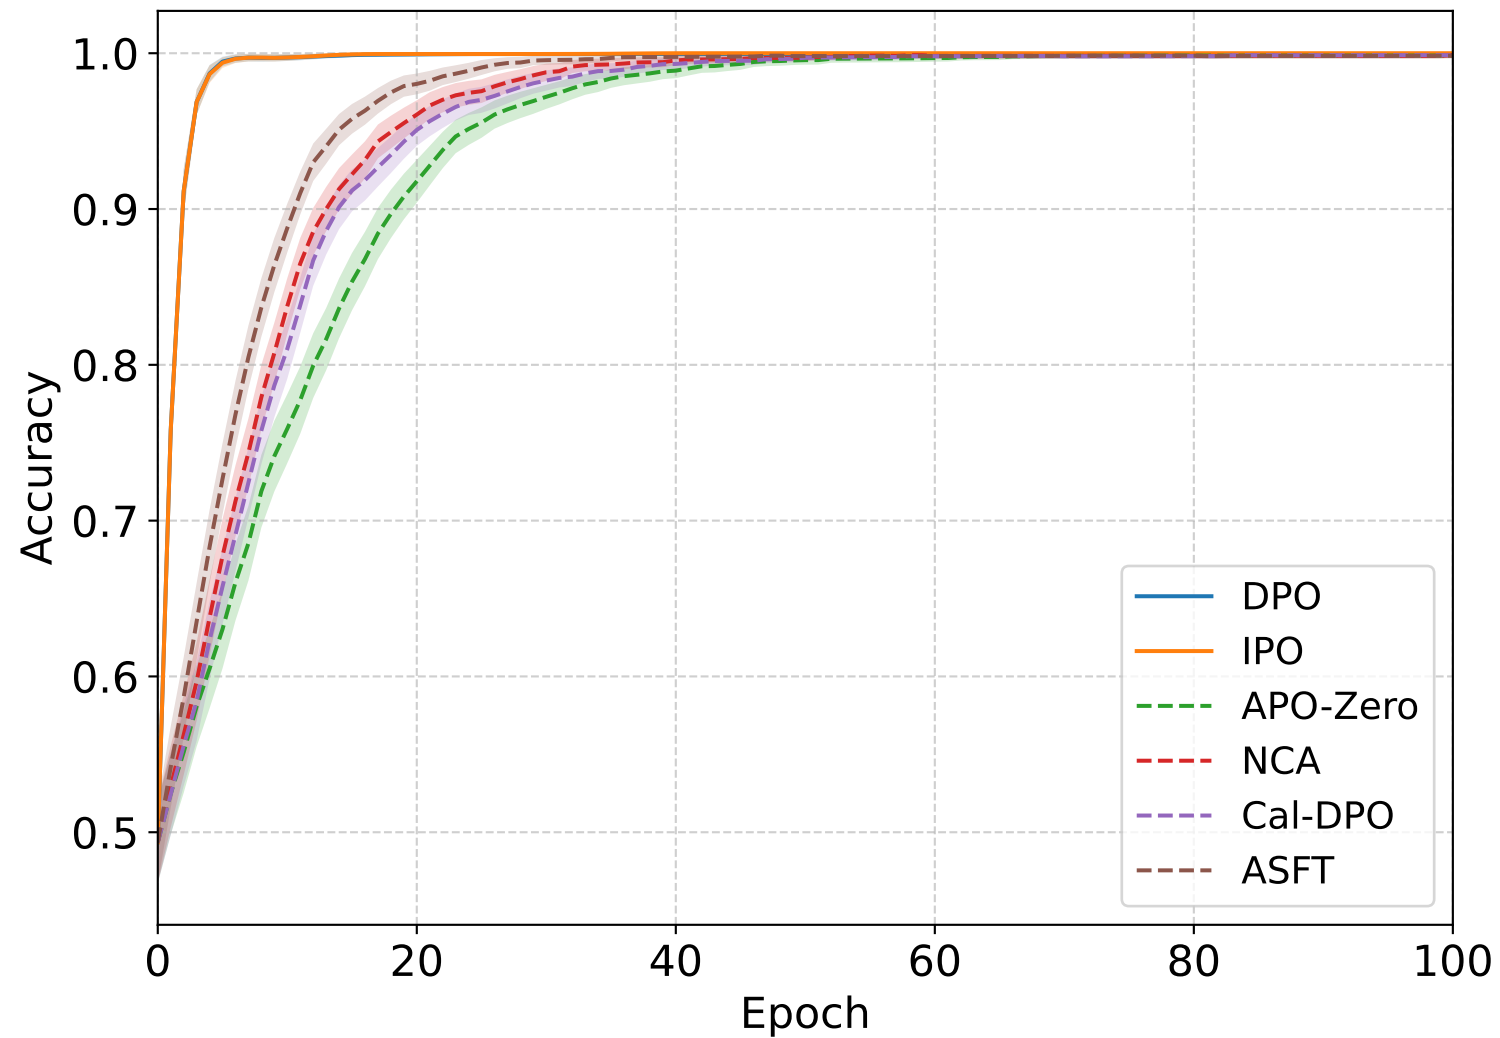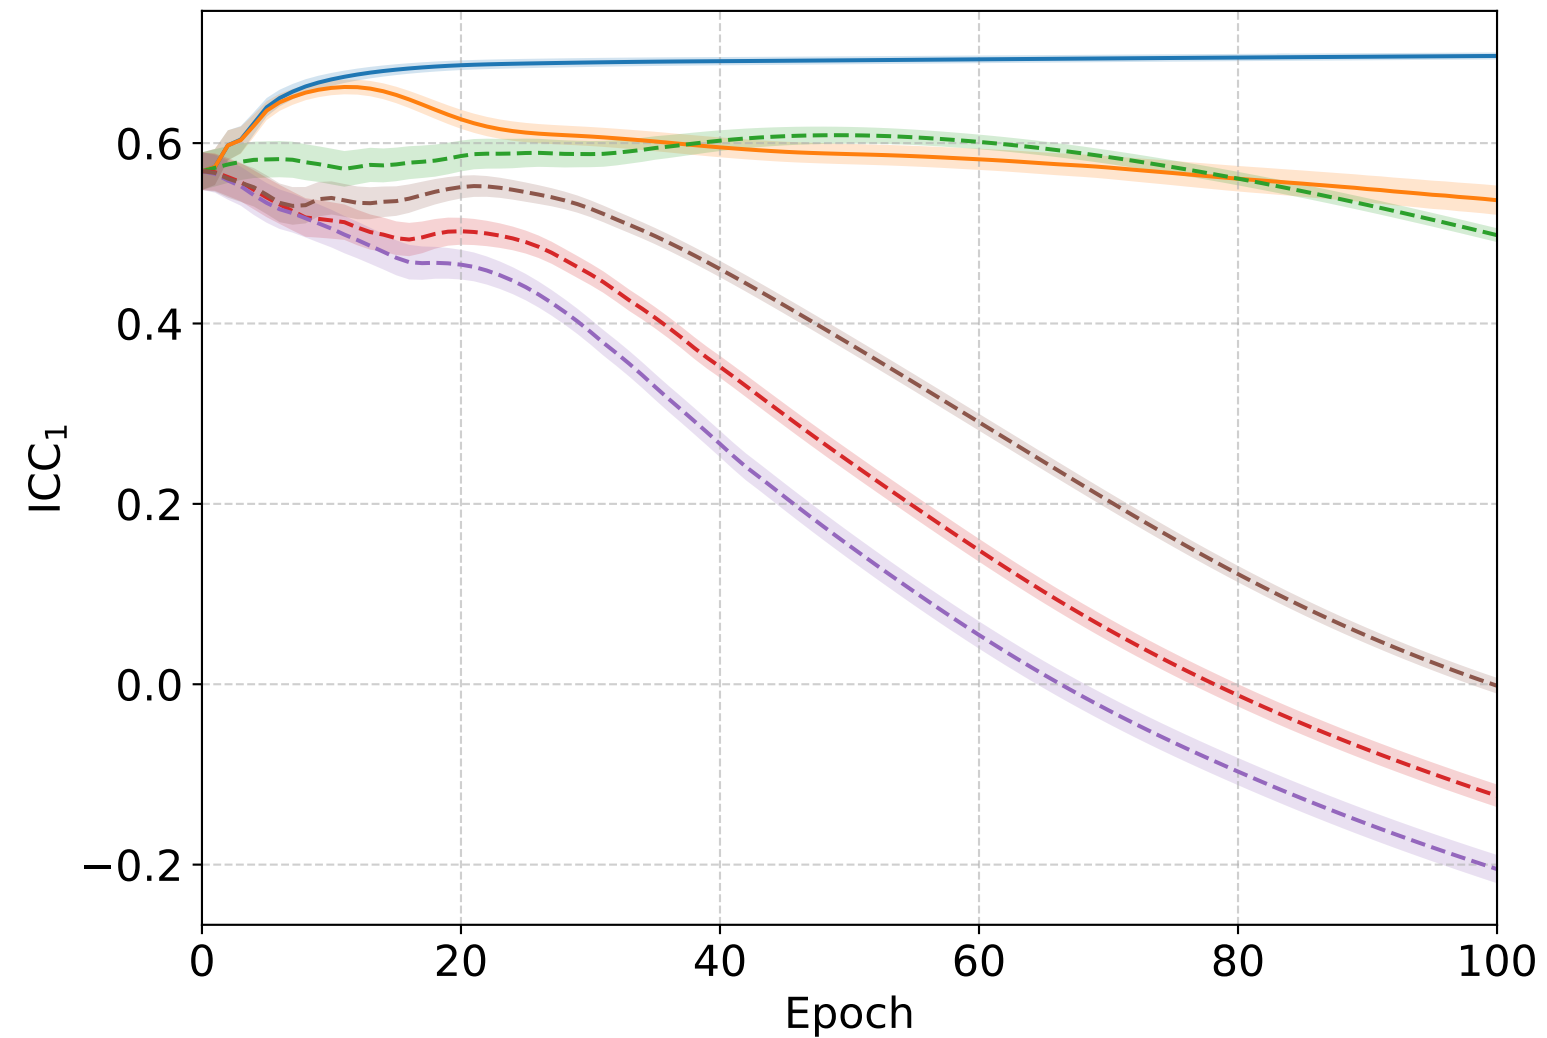

Supplement: supplementary_material [file losses_hid8_w_bias.pdf › blur_repo/toy_example/plots/losses_hid8_w_bias.pdf]
